# Supplementary material for: Foreign Plastid Sequences in Plant Mitochondria are Frequently Acquired Via Mitochondrion-to-Mitochondrion Horizontal Transfer
Source: PubMed Central journal article supplement (PMC5338292; doi:10.1038/srep43402), 2017-03-06

# **Foreign plastid sequences in plant mitochondria are frequently acquired via mitochondrion-to-mitochondrion horizontal transfer**

C.L. Gandini<sup>1</sup> and M.V. Sanchez-Puerta<sup>1,2\*</sup>

<sup>1</sup>IBAM, Universidad Nacional de Cuyo, CONICET, Facultad de Ciencias Agrarias, Almirante Brown 500, M5528AHB, Chacras de Coria, Argentina. <sup>2</sup>Facultad de Ciencias Exactas y Naturales, Universidad Nacional de Cuyo, 5500, Mendoza, Argentina.

\*Author for Correspondence: M. Virginia Sanchez-Puerta

ORCID 0000-0003-2511-5093

Email: [mvsanchezpuerta@fca.uncu.edu.ar](mailto:mvsanchezpuerta@fca.uncu.edu.ar)

Phone +54 (261) 4135000 ext.1307

**Table S1. Plastid-derived sequences in the mitochondrial genome of the green lineage**

| Species name                             | mtDNA GenBank accession number | ptDNA available?      |                     |                      |                     | MTPTs           |                   |                 | mtDNA length (kb) | foreign MTPTs (> 200 bp) |                   |
|------------------------------------------|--------------------------------|-----------------------|---------------------|----------------------|---------------------|-----------------|-------------------|-----------------|-------------------|--------------------------|-------------------|
|                                          |                                | from the same species | from the same genus | from the same family | from the same order | count (>200 bp) | total length (kb) | mt coverage (%) |                   | count                    | total length (kb) |
| <b>Angiosperms (polyplastidic cells)</b> |                                |                       |                     |                      |                     |                 |                   |                 |                   |                          |                   |
| <i>Aegilops speltoides</i>               | NC_022666                      | yes                   | -                   | -                    | -                   | 14              | 15.13             | 3.18            | 476.09            | -                        | -                 |
| <i>Ajuga reptans</i>                     | NC_023103                      | yes                   | -                   | -                    | -                   | 5               | 2.33              | 0.66            | 352.07            | -                        | -                 |
| <i>Allium cepa</i>                       | NC_024813                      | yes                   | -                   | -                    | -                   | 16              | 27.95             | 8.84            | 316.36            | -                        | -                 |
| <i>Amborella trichopoda</i>              | KF754799-KF754803              | yes                   | -                   | -                    | -                   | 61              | 130.32            | 3.37            | 3866.04           | 4                        | 10.21             |
| <i>Arabidopsis thaliana</i>              | NC_001284                      | yes                   | -                   | -                    | -                   | 9               | 4.85              | 1.32            | 366.92            | -                        | -                 |
| <i>Asclepias syriaca</i>                 | NC_022796                      | yes                   | -                   | -                    | -                   | 41              | 53.08             | 7.78            | 682.50            | 4                        | 3.98              |
| <i>Batis maritima</i>                    | NC_024429                      | no                    | no                  | no                   | yes                 | 9               | 3.38              | 0.84            | 403.93            | -                        | -                 |
| <i>Beta macrocarpa</i>                   | NC_015994                      | no                    | yes                 | -                    | -                   | 10              | 8.73              | 2.26            | 385.22            | -                        | -                 |
| <i>Beta vulgaris subsp. maritima</i>     | NC_015099                      | no                    | yes                 | -                    | -                   | 17              | 7.87              | 2.16            | 364.95            | -                        | -                 |
| <i>Beta vulgaris subsp. vulgaris</i>     | NC_002511                      | yes                   | -                   | -                    | -                   | 17              | 8.56              | 2.32            | 368.80            | -                        | -                 |
| <i>Boea hygrometrica</i>                 | NC_016741                      | yes                   | -                   | -                    | -                   | 35              | 44.72             | 8.76            | 510.52            | -                        | -                 |
| <i>Brassica carinata</i>                 | NC_016120                      | no                    | yes                 | -                    | -                   | 7               | 6.26              | 2.69            | 232.24            | -                        | -                 |
| <i>Brassica juncea</i>                   | NC_016123                      | yes                   | -                   | -                    | -                   | 6               | 7.13              | 3.24            | 219.77            | -                        | -                 |
| <i>Brassica napus</i>                    | NC_008285                      | yes                   | -                   | -                    | -                   | 5               | 5.25              | 2.36            | 221.85            | -                        | -                 |
| <i>Brassica nigra</i>                    | NC_029182                      | yes                   | -                   | -                    | -                   | 6               | 6.23              | 2.68            | 232.41            | -                        | -                 |
| <i>Brassica oleracea var. oleracea</i>   | NC_016118                      | no                    | yes                 | -                    | -                   | 16              | 14.28             | 3.96            | 360.27            | -                        | -                 |
| <i>Brassica rapa</i>                     | NC_016125                      | yes                   | -                   | -                    | -                   | 6               | 7.12              | 3.24            | 219.75            | -                        | -                 |
| <i>Cannabis sativa</i>                   | NC_029855                      | yes                   | -                   | -                    | -                   | 13              | 6.69              | 1.61            | 415.60            | -                        | -                 |
| <i>Capsicum annuum</i>                   | NC_024624                      | yes                   | -                   | -                    | -                   | 28              | 46.70             | 9.13            | 511.53            | -                        | -                 |
| <i>Carica papaya</i>                     | NC_012116                      | yes                   | -                   | -                    | -                   | 14              | 22.91             | 4.80            | 476.89            | -                        | -                 |
| <i>Citrullus lanatus</i>                 | NC_014043                      | no                    | no                  | yes                  | -                   | 14              | 14.59             | 3.85            | 379.24            | -                        | -                 |
| <i>Cucumis sativus</i>                   | NC_016004-NC_016006            | yes                   | -                   | -                    | -                   | 27              | 63.48             | 4.77            | 1331.31           | -                        | -                 |
| <i>Cucurbita pepo</i>                    | NC_014050                      | no                    | no                  | yes                  | -                   | 41              | 74.77             | 7.61            | 982.83            | 2                        | 2.06              |
| <i>Daucus carota</i>                     | NC_017855                      | yes                   | -                   | -                    | -                   | 9               | 8.61              | 3.06            | 281.13            | -                        | -                 |
| <i>Erythranthe guttata</i>               | NC_018041                      | no                    | yes                 | -                    | -                   | 15              | 15.97             | 3.04            | 525.67            | 1                        | 0.35              |
| <i>Geranium maderense</i>                | NC_027000                      | yes                   | -                   | -                    | -                   | 53              | 76.48             | 10.38           | 737.09            | 1                        | 0.38              |
| <i>Glycine max</i>                       | NC_020455                      | yes                   | -                   | -                    | -                   | 15              | 5.30              | 1.32            | 402.56            | 1                        | 0.69              |
| <i>Gossypium barbadense</i>              | NC_028254                      | yes                   | -                   | -                    | -                   | 22              | 11.94             | 1.76            | 677.43            | -                        | -                 |
| <i>Gossypium harknessii</i>              | NC_027407                      | no                    | yes                 | -                    | -                   | 22              | 10.68             | 1.60            | 666.08            | 1                        | 0.22              |
| <i>Gossypium hirsutum</i>                | NC_027406                      | yes                   | -                   | -                    | -                   | 21              | 11.61             | 1.74            | 668.58            | -                        | -                 |
| <i>Gossypium raimondii</i>               | NC_029998                      | yes                   | -                   | -                    | -                   | 15              | 9.19              | 1.36            | 676.08            | -                        | -                 |
| <i>Helianthus annuus</i>                 | NC_023337                      | yes                   | -                   | -                    | -                   | 12              | 6.73              | 2.24            | 300.95            | 1                        | 0.60              |
| <i>Heuchera parviflora</i>               | KR559021                       | yes                   | -                   | -                    | -                   | 10              | 11.53             | 2.12            | 542.95            | -                        | -                 |
| <i>Hevea brasiliensis</i>                | AP014526                       | yes                   | -                   | -                    | -                   | 22              | 29.31             | 2.21            | 1325.82           | -                        | -                 |
| <i>Hyoscyamus niger</i>                  | NC_026515                      | yes                   | -                   | -                    | -                   | 23              | 13.70             | 2.73            | 501.40            | 2                        | 2.96              |
| <i>Liriodendron tulipifera</i>           | NC_021152                      | yes                   | -                   | -                    | -                   | 14              | 27.17             | 4.91            | 553.72            | -                        | -                 |
| <i>Lophophytum mirabile</i>              | KU992322-KU992380              | no                    | no                  | no                   | yes                 | 7               | 3.84              | 2.20            | 821.92            | 7                        | 3.84              |
| <i>Lotus japonicus</i>                   | NC_016743                      | yes                   | -                   | -                    | -                   | 13              | 7.38              | 1.94            | 380.86            | 1                        | 1.02              |
| <i>Malus domestica</i>                   | NC_018554                      | no                    | yes                 | -                    | -                   | 7               | 2.82              | 0.71            | 396.95            | -                        | -                 |
| <i>Medicago truncatula</i>               | NC_029641                      | no                    | yes                 | -                    | -                   | 8               | 2.78              | 1.02            | 271.62            | -                        | -                 |
| <i>Milletia pinnata</i>                  | NC_016742                      | yes                   | -                   | -                    | -                   | 7               | 4.41              | 1.03            | 425.72            | -                        | -                 |
| <i>Nicotiana tabacum</i>                 | NC_006581                      | yes                   | -                   | -                    | -                   | 14              | 11.86             | 2.75            | 430.60            | -                        | -                 |
| <i>Oryza minuta</i>                      | NC_029816                      | yes                   | -                   | -                    | -                   | 36              | 38.79             | 7.53            | 515.02            | -                        | -                 |
| <i>Oryza rufipogon</i>                   | NC_013816                      | yes                   | -                   | -                    | -                   | 29              | 31.81             | 5.69            | 559.05            | -                        | -                 |
| <i>Oryza sativa Indica group</i>         | NC_007886                      | yes                   | -                   | -                    | -                   | 47              | 34.82             | 7.08            | 491.52            | -                        | -                 |
| <i>Oryza sativa Japonica group</i>       | NC_011033                      | yes                   | -                   | -                    | -                   | 47              | 33.98             | 6.93            | 490.52            | -                        | -                 |
| <i>Phoenix dactylifera</i>               | NC_016740                      | yes                   | -                   | -                    | -                   | 30              | 70.49             | 9.86            | 715.00            | 1                        | 0.85              |
| <i>Populus tremula</i>                   | NC_028096                      | yes                   | -                   | -                    | -                   | 53              | 19.97             | 2.55            | 783.00            | -                        | -                 |
| <i>Populus tremula x Populus alba</i>    | NC_028329                      | yes                   | -                   | -                    | -                   | 53              | 20.39             | 2.60            | 783.00            | -                        | -                 |
| <i>Raphanus sativus</i>                  | NC_018551                      | yes                   | -                   | -                    | -                   | 12              | 9.94              | 3.85            | 258.43            | -                        | -                 |
| <i>Rhazya stricta</i>                    | NC_024293                      | yes                   | -                   | -                    | -                   | 17              | 31.11             | 5.67            | 548.61            | 1                        | 1.62              |
| <i>Salix purpurea</i>                    | NC_029693                      | yes                   | -                   | -                    | -                   | 20              | 19.65             | 3.28            | 598.97            | -                        | -                 |
| <i>Salix suchowensis</i>                 | NC_029317                      | yes                   | -                   | -                    | -                   | 20              | 14.87             | 2.31            | 644.44            | -                        | -                 |
| <i>Salvia miltiorrhiza</i>               | NC_023209                      | yes                   | -                   | -                    | -                   | 17              | 16.73             | 3.35            | 499.24            | 1                        | 0.35              |
| <i>Silene latifolia</i>                  | NC_014487                      | yes                   | -                   | -                    | -                   | 5               | 2.10              | 0.83            | 253.41            | -                        | -                 |
| <i>Silene noctiflora</i>                 | JF750431-JF750489              | yes                   | -                   | -                    | -                   | 8               | 2.48              | 0.04            | 6727.87           | -                        | -                 |
| <i>Silene vulgaris</i>                   | JF750427-JF750430              | yes                   | -                   | -                    | -                   | 7               | 9.74              | 2.28            | 427.14            | -                        | -                 |
| <i>Sorghum bicolor</i>                   | NC_008360                      | yes                   | -                   | -                    | -                   | 17              | 26.67             | 5.69            | 468.63            | -                        | -                 |
| <i>Spirodela polyrhiza</i>               | NC_017840                      | yes                   | -                   | -                    | -                   | 11              | 7.65              | 3.35            | 228.49            | -                        | -                 |
| <i>Tripsacum dactyloides</i>             | NC_008362                      | no                    | no                  | yes                  | -                   | 21              | 25.41             | 3.61            | 704.10            | -                        | -                 |
| <i>Triticum aestivum</i>                 | NC_007579                      | yes                   | -                   | -                    | -                   | 27              | 19.89             | 4.40            | 452.53            | -                        | -                 |
| <i>Triticum timopheevii</i>              | NC_022714                      | yes                   | -                   | -                    | -                   | 12              | 12.83             | 2.89            | 443.42            | -                        | -                 |
| <i>Vaccinium macrocarpon</i>             | NC_023338                      | yes                   | -                   | -                    | -                   | 16              | 7.27              | 1.58            | 459.68            | -                        | -                 |
| <i>Vigna angularis</i>                   | NC_021092                      | yes                   | -                   | -                    | -                   | 5               | 3.04              | 0.75            | 404.47            | -                        | -                 |
| <i>Vigna radiata</i>                     | NC_015121                      | yes                   | -                   | -                    | -                   | 7               | 3.25              | 0.81            | 401.26            | -                        | -                 |
| <i>Viscum album</i>                      | NC_029039                      | yes                   | -                   | -                    | -                   | 2               | 0.41              | 0.07            | 565.00            | -                        | -                 |
| <i>Vitis vinifera</i>                    | NC_012119                      | yes                   | -                   | -                    | -                   | 22              | 58.45             | 7.56            | 773.28            | -                        | -                 |
| <i>Zea luxurians</i>                     | NC_008333                      | yes                   | -                   | -                    | -                   | 14              | 19.58             | 3.63            | 539.37            | -                        | -                 |
| <i>Zea mays subsp. mays</i>              | NC_007982                      | yes                   | -                   | -                    | -                   | 27              | 6.48              | 1.14            | 569.63            | -                        | -                 |
| <i>Zea mays subsp. parviglumis</i>       | NC_008332                      | yes                   | -                   | -                    | -                   | 27              | 16.83             | 2.47            | 680.60            | -                        | -                 |
| <i>Zea perennis</i>                      | NC_008331                      | yes                   | -                   | -                    | -                   | 17              | 20.87             | 3.66            | 570.35            | -                        | -                 |
| <i>Ziziphus jujuba</i>                   | NC_029809                      | yes                   | -                   | -                    | -                   | 16              | 22.35             | 6.12            | 365.20            | -                        | -                 |
| <b>SubTotal</b>                          | <b>72</b>                      |                       |                     |                      |                     | <b>1372</b>     |                   |                 |                   | <b>28</b>                |                   |

| <b>Gymnosperms (polyplastidic cells)</b>                                |              |     |     |     |     |             |       |      |        |           |   |
|-------------------------------------------------------------------------|--------------|-----|-----|-----|-----|-------------|-------|------|--------|-----------|---|
| <i>Cycas taitungensis</i>                                               | NC_010303    | yes | -   | -   | -   | 6           | 13.28 | 3.20 | 414.90 | -         | - |
| <i>Ginkgo biloba</i>                                                    | NC_027976    | yes | -   | -   | -   | 2           | 0.87  | 0.25 | 346.54 | -         | - |
| <i>Welwitschia mirabilis</i>                                            | NC_029130    | yes | -   | -   | -   | 5           | 6.65  | 0.68 | 978.85 | -         | - |
| <b>SubTotal</b>                                                         | <b>3</b>     |     |     |     |     | <b>13</b>   |       |      |        | <b>0</b>  |   |
| <b>Mosses (polyplastidic cells, monoplastidic cells during meiosis)</b> |              |     |     |     |     |             |       |      |        |           |   |
| <i>Anomodon attenuatus</i>                                              | NC_021931    | no  | no  | no  | yes | -           | -     | -    | 104.25 | -         | - |
| <i>Anomodon rugelii</i>                                                 | NC_016121    | no  | no  | no  | yes | -           | -     | -    | 104.24 | -         | - |
| <i>Climacium americanum</i>                                             | NC_024515    | no  | no  | no  | yes | -           | -     | -    | 105.05 | -         | - |
| <i>Hypnum imponens</i>                                                  | NC_024516    | no  | no  | no  | yes | -           | -     | -    | 103.83 | -         | - |
| <i>Orthotrichum diaphanum</i>                                           | NC_029356    | no  | yes | -   | -   | -           | -     | -    | 104.74 | -         | - |
| <i>Orthotrichum macrocephalum</i>                                       | NC_029355    | no  | yes | -   | -   | -           | -     | -    | 104.62 | -         | - |
| <i>Orthotrichum speciosum</i>                                           | NC_026121    | no  | yes | -   | -   | -           | -     | -    | 104.75 | -         | - |
| <i>Orthotrichum stellatum</i>                                           | NC_024522    | no  | yes | -   | -   | -           | -     | -    | 104.13 | -         | - |
| <i>Physcomitrella patens</i>                                            | NC_007945    | yes | -   | -   | -   | -           | -     | -    | 105.34 | -         | - |
| <b>SubTotal</b>                                                         | <b>9</b>     |     |     |     |     | <b>0</b>    |       |      |        | <b>0</b>  |   |
| <b>Lycopods (monoplastidic cells)</b>                                   |              |     |     |     |     |             |       |      |        |           |   |
| <i>Huperzia squarrosa</i>                                               | NC_017755    | no  | yes | -   | -   | -           | -     | -    | 413.53 | -         | - |
| <b>SubTotal</b>                                                         | <b>1</b>     |     |     |     |     | <b>0</b>    |       |      |        | <b>0</b>  |   |
| <b>Liverworts (monoplastidic cells)</b>                                 |              |     |     |     |     |             |       |      |        |           |   |
| <i>Aneura pinguis</i>                                                   | NC_026901    | no  | yes | -   | -   | -           | -     | -    | 165.60 | -         | - |
| <i>Marchantia polymorpha</i>                                            | NC_001660    | yes | -   | -   | -   | -           | -     | -    | 186.61 | -         | - |
| <b>SubTotal</b>                                                         | <b>2</b>     |     |     |     |     | <b>0</b>    |       |      |        | <b>0</b>  |   |
| <b>Hornworts (monoplastidic cells)</b>                                  |              |     |     |     |     |             |       |      |        |           |   |
| <i>Oltmannsiellopsis viridis</i>                                        | NC_008256    | yes | -   | -   | -   | -           | -     | -    | 56.76  | -         | - |
| <b>SubTotal</b>                                                         | <b>1</b>     |     |     |     |     | <b>0</b>    |       |      |        | <b>0</b>  |   |
| <b>Green Algae (most of them monoplastidic cells)</b>                   |              |     |     |     |     |             |       |      |        |           |   |
| <b>Charophycean green algae</b>                                         |              |     |     |     |     |             |       |      |        |           |   |
| <i>Chaetosphaeridium globosum</i>                                       | NC_004118    | yes | -   | -   | -   | -           | -     | -    | 56.57  | -         | - |
| <i>Chara vulgaris</i>                                                   | NC_005255    | yes | -   | -   | -   | -           | -     | -    | 67.74  | -         | - |
| <i>Chlorokybus atmophyticus</i>                                         | NC_009630    | yes | -   | -   | -   | -           | -     | -    | 201.76 | -         | - |
| <i>Closterium baillyanum</i>                                            | NC_022860    | no  | no  | no  | yes | -           | -     | -    | 152.09 | -         | - |
| <i>Entransia fimbriata</i>                                              | NC_022861    | yes | -   | -   | -   | -           | -     | -    | 61.65  | -         | - |
| <i>Klebsormidium flaccidum</i>                                          | DF238763     | yes | -   | -   | -   | -           | -     | -    | 106.47 | -         | - |
| <b>SubTotal</b>                                                         | <b>6</b>     |     |     |     |     | <b>0</b>    |       |      |        | <b>0</b>  |   |
| <b>Division Chlorophyta</b>                                             |              |     |     |     |     |             |       |      |        |           |   |
| <i>Auxenochlorella protothecoides</i>                                   | NC_026009    | yes | -   | -   | -   | -           | -     | -    | 57.27  | -         | - |
| <i>Bathycoccus prasinus</i>                                             | NC_023273    | yes | -   | -   | -   | -           | -     | -    | 43.61  | -         | - |
| <i>Botryococcus braunii</i>                                             | NC_027722    | yes | -   | -   | -   | -           | -     | -    | 84.58  | -         | - |
| <i>Bracteacoccus aerius</i>                                             | NC_024755    | yes | -   | -   | -   | -           | -     | -    | 47.16  | -         | - |
| <i>Bracteacoccus minor</i>                                              | NC_024756    | yes | -   | -   | -   | -           | -     | -    | 45.18  | -         | - |
| <i>Chlamydomonas leiostraca</i>                                         | NC_026573    | no  | yes | -   | -   | -           | -     | -    | 14.03  | -         | - |
| <i>Chlamydomonas moewusii</i>                                           | NC_001872    | no  | yes | -   | -   | -           | -     | -    | 22.90  | -         | - |
| <i>Chlamydomonas reinhardtii</i>                                        | NC_001638    | yes | -   | -   | -   | -           | -     | -    | 15.76  | -         | - |
| <i>Chlorella sorokiniana</i>                                            | NC_024626    | yes | -   | -   | -   | -           | -     | -    | 52.53  | -         | - |
| <i>Chlorella variabilis</i>                                             | NC_025413    | yes | -   | -   | -   | -           | -     | -    | 78.50  | -         | - |
| <i>Chlorotetraedron incus</i>                                           | NC_024757    | yes | -   | -   | -   | -           | -     | -    | 38.41  | -         | - |
| <i>Chromochloris zofingiensis</i>                                       | NC_024758    | yes | -   | -   | -   | -           | -     | -    | 44.84  | -         | - |
| <i>Coccomyxa sp</i>                                                     | NC_015316    | yes | -   | -   | -   | -           | -     | -    | 65.50  | -         | - |
| <i>Dunaliella salina</i>                                                | NC_012930    | yes | -   | -   | -   | -           | -     | -    | 28.33  | -         | - |
| <i>Dunaliella viridis</i>                                               | NC_026571    | no  | yes | -   | -   | -           | -     | -    | 45.98  | -         | - |
| <i>Gonium pectorale</i>                                                 | NC_020437    | no  | no  | no  | yes | -           | -     | -    | 15.99  | -         | - |
| <i>Helicosporidium sp</i>                                               | NC_017841    | yes | -   | -   | -   | -           | -     | -    | 49.34  | -         | - |
| <i>Kirchneriella aperta</i>                                             | NC_024759    | yes | -   | -   | -   | -           | -     | -    | 52.93  | -         | - |
| <i>Lobosphaera incisa</i>                                               | NC_027060    | yes | -   | -   | -   | -           | -     | -    | 70.00  | -         | - |
| <i>Micromonas sp</i>                                                    | NC_012643    | yes | -   | -   | -   | -           | -     | -    | 47.43  | -         | - |
| <i>Microspora stagnorum</i>                                             | NC_022862    | no  | no  | yes | -   | -           | -     | -    | 87.41  | -         | - |
| <i>Monomastix sp</i>                                                    | NC_022797    | yes | -   | -   | -   | -           | -     | -    | 60.88  | -         | - |
| <i>Monoraphidium neglectum</i>                                          | NW_014013625 | yes | -   | -   | -   | -           | -     | -    | 93.84  | -         | - |
| <i>Mychonastes homosphaera</i>                                          | NC_024760    | yes | -   | -   | -   | -           | -     | -    | 25.15  | -         | - |
| <i>Neochloris aquatica</i>                                              | NC_024761    | yes | -   | -   | -   | -           | -     | -    | 38.02  | -         | - |
| <i>Nephroselmis olivacea</i>                                            | NC_008239    | yes | -   | -   | -   | -           | -     | -    | 45.22  | -         | - |
| <i>Ostreococcus tauri</i>                                               | NC_008290    | yes | -   | -   | -   | -           | -     | -    | 44.24  | -         | - |
| <i>Ourococcus multisporus</i>                                           | NC_024762    | no  | yes | -   | -   | -           | -     | -    | 49.71  | -         | - |
| <i>Pedinomonas minor</i>                                                | NC_000892    | yes | -   | -   | -   | -           | -     | -    | 25.14  | -         | - |
| <i>Pleodorina starii</i>                                                | NC_021108    | yes | -   | -   | -   | -           | -     | -    | 20.38  | -         | - |
| <i>Polytoma uvella</i>                                                  | NC_026572    | no  | no  | no  | yes | -           | -     | -    | 17.41  | -         | - |
| <i>Polytomella capuana</i>                                              | NC_010357    | no  | no  | no  | yes | -           | -     | -    | 13.00  | -         | - |
| <i>Polytomella magna</i>                                                | NC_023091    | no  | no  | no  | yes | -           | -     | -    | 24.37  | -         | - |
| <i>Polytomella parva</i>                                                | NC_016916    | no  | no  | no  | yes | -           | -     | -    | 13.14  | -         | - |
| <i>Polytomella parva</i>                                                | NC_016917    | no  | no  | no  | yes | -           | -     | -    | 3.02   | -         | - |
| <i>Polytomella sp</i>                                                   | NC_013472    | no  | no  | no  | yes | -           | -     | -    | 13.00  | -         | - |
| <i>Polytomella sp</i>                                                   | NC_016918    | no  | no  | no  | yes | -           | -     | -    | 3.08   | -         | - |
| <i>Prasinoderma coloniale</i>                                           | NC_023355    | yes | -   | -   | -   | -           | -     | -    | 54.55  | -         | - |
| <i>Prototheca wickerhamii</i>                                           | NC_001613    | no  | no  | yes | -   | -           | -     | -    | 55.33  | -         | - |
| <i>Pseudodoctonum akinetum</i>                                          | NC_005926    | yes | -   | -   | -   | -           | -     | -    | 95.88  | -         | - |
| <i>Pseudomuriella schumacherensis</i>                                   | NC_024763    | yes | -   | -   | -   | -           | -     | -    | 43.13  | -         | - |
| <i>Pycnococcus provasolii</i>                                           | NC_013935    | yes | -   | -   | -   | -           | -     | -    | 24.32  | -         | - |
| <b>SubTotal</b>                                                         | <b>42</b>    |     |     |     |     | <b>0</b>    |       |      |        | <b>0</b>  |   |
| <b>TOTAL</b>                                                            | <b>136</b>   |     |     |     |     | <b>1385</b> |       |      |        | <b>28</b> |   |

**Table S2. Mitochondrial sequences identified in flowering plant plastid genomes.**

| # PTMT | recipient plastid genome                    |                                                | ptDNA<br>GenBank<br>accession<br>number | PTMT           |                |                |                                 | putative donor of the mitochondrial sequence |                                                | Identity<br>(%) |
|--------|---------------------------------------------|------------------------------------------------|-----------------------------------------|----------------|----------------|----------------|---------------------------------|----------------------------------------------|------------------------------------------------|-----------------|
|        | species <sup>a</sup>                        | lineage                                        |                                         | start<br>(nt)  | end<br>(nt)    | length<br>(bp) | gene content                    | species                                      | lineage                                        |                 |
| 1      | <i>Daucus carota</i> <sup>1</sup>           | Asterids; campanulids;<br>Apiales; Apiaceae    | NC_008325                               | 99297          | 100748         | 1452           | partial <i>coxI</i>             | <i>Daucus carota</i>                         | Asterids; campanulids; Apiales;<br>Apiaceae    | 99              |
| 2      | <i>Asclepias spp.</i> <sup>2</sup>          | Asterids; lamiids; Gentianales;<br>Apocynaceae | NC_022432                               | 16591          | 19225          | 2635           | non-coding region               | <i>Asclepias syriaca</i>                     | Asterids; lamiids; Gentianales;<br>Apocynaceae | 85              |
| 3      | <i>Pariana spp.</i> <sup>3</sup>            | Poales; Poaceae; BOP clade                     | NC_027491;<br>KP319245;<br>KP319246     | 84561          | 87686          | 3126           | non-coding region               | <i>Ferrocalamus rimosivaginus</i>            | Poales; Poaceae; BOP clade                     | 98              |
| 4      | <i>Paspalum spp.</i> <sup>4</sup>           | Poales; Poaceae; PACMAD<br>clade               | NC_030495                               | 84665<br>86867 | 86100<br>87405 | 1436<br>539    | non-coding region               | <i>Tripsacum dactyloides</i>                 | Poales; Poaceae; PACMAD<br>clade               | 98<br>99        |
| 5      | <i>Lavandula angustifolia</i> <sup>5</sup>  | Asterids; lamiids; Lamiales;<br>Lamiaceae      | NC_029370                               | 152063         | 153448         | 1386           | <i>trnH-GUG</i>                 | <i>Salvia miltiorhizza</i>                   | Asterids; lamiids; Lamiales;<br>Lamiaceae      | 95              |
| 6      | <i>Orobanche californica</i> <sup>5</sup>   | Asterids; lamiids; Lamiales;<br>Orobanchaceae  | NC_025651                               | 87733          | 88413          | 681            | orf144, hypothetical<br>protein | <i>Capsicum annuum</i>                       | Asterids; lamiids; Solanales;<br>Solanaceae    | 93              |
| 7      | <i>Scutellaria baicalensis</i> <sup>5</sup> | Asterids; lamiids; Lamiales;<br>Lamiaceae      | NC_027262                               | 152335         | 152731         | 397            | <i>trnH-GUG</i>                 | <i>Mimulus guttatus</i>                      | Asterids; lamiids; Lamiales;<br>Phrymaceae     | 96              |

<sup>a</sup> 1) Iorizzo et al, 2012; 2) Straub et al, 2013; 3) Ma et al, 2015; 4) Burke et al, 2016; 5) this study

**Table S3. List of complete plastid genomes analyzed in this study.**

NC\_026892 *Abies koreana*; NC\_026134 *Acacia ligulata*; NC\_030331 *Acer davidii*; NC\_030343 *Acer miaotaiense*; NC\_029371 *Acer morrisonense*; NC\_015820 *Acidosasa purpurea*; NC\_030534 *Acioa guianensis*; NC\_030056 *Acnistus arborescens*; NC\_030185 *Acnistus arborescens*; NC\_029973 *Acoelorrhaphe wrightii*; NC\_029829 *Aconitum chiisanense*; NC\_010093 *Acorus americanus*; NC\_007407 *Acorus calamus*; NC\_026299 *Acorus gramineus*; NC\_026690 *Actinidia chinensis*; NC\_026691 *Actinidia deliciosa*; NC\_008101 *Acutodesmus obliquus*; NC\_026999 *Adenophora remotiflora*; NC\_004766 *Adiantum capillus*; NC\_024831 *Aegilops bicornis*; NC\_023096 *Aegilops cylindrica*; NC\_023097 *Aegilops geniculata*; NC\_024832 *Aegilops kotschyi*; NC\_024830 *Aegilops longissima*; NC\_024815 *Aegilops searsii*; NC\_024816 *Aegilops sharonensis*; NC\_022135 *Aegilops speltoides*; NC\_022133 *Aegilops tauschii*; NC\_009265 *Aethionema cordifolium*; NC\_009266 *Aethionema grandiflorum*; NC\_030544 *Afrolicania elaeosperma*; NC\_023119 *Agathis dammara*; NC\_015621 *Ageratina adenophora*; NC\_023357 *Agrostemma githago*; NC\_008591 *Agrostis stolonifera*; NC\_023102 *Ajuga reptans*; NC\_029427 *Akebia trifoliata*; NC\_024813 *Allium cepa*; NC\_022413 *Allosyncarpia ternata*; NC\_027951 *Alloteropsis angusta*; NC\_027952 *Alloteropsis cimicina*; NC\_027824 *Alloteropsis semialata*; NC\_012818 *Alsophila spinulosa*; NC\_005086 *Amborella trichopoda*; NC\_027581 *Amentotaxus argotaenia*; NC\_024945 *Amentotaxus formosana*; NC\_027465 *Ammophila breviligulata*; NC\_024731 *Ampelocalamus calcareus*; NC\_027466 *Ampelodesmos mauritanicus*; NC\_030619 *Amphicarpum muhlenbergianum*; NC\_026220 *Ananas comosus*; NC\_022451 *Andrographis paniculata*; NC\_029470 *Anethum graveolens*; NC\_010359 *Aneura mirabilis*; NC\_030545 *Angelesia splendens*; NC\_029391 *Angelica acutiloba*; NC\_029392 *Angelica dahurica*; NC\_029393 *Angelica gigas*; NC\_026300 *Angiopteris angustifolia*; NC\_008829 *Angiopteris evecta*; NC\_022412 *Angophora costata*; NC\_022411 *Angophora floribunda*; NC\_029735 *Ankyra judayi*; NC\_030166 *Annona cherimola*; NC\_014062 *Anomochloa marantoidea*; NC\_004543 *Anthoceros formosae*; NC\_027467 *Anthoxanthum odoratum*; NC\_015113 *Anthriscus cerefolium*; NC\_029243 *Aquilaria sinensis*; NC\_030346 *Arabidopsis arenicola*; NC\_029334 *Arabidopsis arenosa*; NC\_029335 *Arabidopsis cebennensis*; NC\_030347 *Arabidopsis croatica*; NC\_030348 *Arabidopsis neglecta*; NC\_029336 *Arabidopsis pedemontana*; NC\_030349 *Arabidopsis petrogena*; NC\_030350 *Arabidopsis suecica*; NC\_000932 *Arabidopsis thaliana*; NC\_030351 *Arabidopsis umezawana*; NC\_023367 *Arabis alpina*; NC\_009268 *Arabis hirsuta*; NC\_022810 *Aralia undulata*; NC\_026450 *Araucaria heterophylla*; NC\_021121 *Ardisia polysticta*; NC\_029972 *Areca vestiaria*; NC\_029971 *Arenga caudata*; NC\_025228 *Aristida purpurea*; NC\_020607 *Artemisia frigida*; NC\_025910 *Artemisia montana*; NC\_030613 *Arthraxon prionodes*; NC\_023934 *Arundinaria appalachiana*; NC\_024712 *Arundinaria fargesii*; NC\_020341 *Arundinaria gigantea*; NC\_023935 *Arundinaria tecta*; NC\_030620 *Arundinella deppeana*; NC\_022431 *Asclepias nivea*; NC\_022432 *Asclepias syriaca*; NC\_027434 *Aster spathulifolius*; NC\_029828 *Astragalus mongholicus*; NC\_028171 *Astragalus nakaianus*; NC\_029891 *Astrebla pectinata*; NC\_004561 *Atropa belladonna*; NC\_030546 *Atuna racemosa*; NC\_023775 *Auxenochlorella protothecoides*; NC\_027468 *Avena sativa*; NC\_030501 *Axonopus fissifolius*; NC\_023792 *Azadirachta indica*; NC\_026958 *Bambusa arnhemica*; NC\_026957 *Bambusa bambos*; NC\_015830 *Bambusa emeiensis*; NC\_024668 *Bambusa multiplex*; NC\_012927 *Bambusa oldhamii*; NC\_009269 *Barbarea verna*; NC\_024811 *Bathycoccus prasinus*; NC\_029970 *Baxteria australis*; NC\_030062 *Berberis amurensis*; NC\_022457 *Berberis bealei*; NC\_030063 *Berberis koreana*; NC\_020366 *Bismarckia nobilis*; NC\_029483 *Bletilla ochracea*; NC\_028422 *Bletilla striata*; NC\_016468 *Boea hygrometrica*; NC\_025306 *Bomarea edulis*; NC\_029969 *Borassodendron machadonis*; NC\_029420 *Boswellia sacra*; NC\_030621 *Bothriochloa alta*; NC\_025545 *Botryococcus braunii*; NC\_025641 *Boulardia latisquama*; NC\_029414 *Bouteloua curtipendula*; NC\_029892 *Bouteloua gracilis*; NC\_026036 *Bowenia serrulata*; NC\_027470 *Brachyelytrum aristosum*; NC\_011032 *Brachypodium distachyon*; NC\_029675 *Bracteacoccus aereus*; NC\_028586 *Bracteacoccus giganteus*; NC\_029674 *Bracteacoccus minor*; NC\_029968 *Brahea brandegeei*; NC\_022811 *Brassaiopsis hainla*; NC\_028272 *Brassica juncea*; NC\_016734 *Brassica napus*; NC\_030450 *Brassica nigra*; NC\_015139 *Brassica rapa*; NC\_028633 *Brighamia insignis*; NC\_027471 *Briza maxima*; NC\_027472 *Bromus vulgaris*; NC\_030180 *Bruinsmia polysperma*; NC\_013359 *Bryopsis*

hypnoides; NC\_026795 Bryopsis plumosa; NC\_026968 Buergersiochloa bambusoides; NC\_027834 Bupleurum falcatum; NC\_009599 Buxus microphylla; NC\_020365 Calamus caryotoides; NC\_024544 Calanthe triplicata; NC\_026295 Callitropsis nootkatensis; NC\_026298 Callitropsis vietnamensis; NC\_023121 Calocedrus formosana; NC\_004993 Calycanthus floridus; NC\_029337 Camelina sativa; NC\_024541 Camellia crapnelliana; NC\_022459 Camellia cuspidata; NC\_022460 Camellia danzaiensis; NC\_024659 Camellia grandibracteata; NC\_022461 Camellia impressinervis; NC\_024660 Camellia leptophylla; NC\_023084 Camellia oleifera; NC\_024661 Camellia petelotii; NC\_022462 Camellia pitardii; NC\_024662 Camellia pubicosta; NC\_024663 Camellia reticulata; NC\_020019 Camellia sinensis; NC\_022264 Camellia taliensis; NC\_022463 Camellia yunnanensis; NC\_026203 Campanula takesimana; NC\_026785 Campynema lineare; NC\_026562 Cannabis sativa; NC\_030622 Capillipedium venustum; NC\_009270 Capsella bursa; NC\_028517 Capsella grandiflora; NC\_027693 Capsella rubella; NC\_018552 Capsicum annum; NC\_030543 Capsicum chinense; NC\_028007 Capsicum frutescens; NC\_026551 Capsicum lycianthoides; NC\_026445 Cardamine impatiens; NC\_026446 Cardamine resedifolia; NC\_027250 Carex siderosticta; NC\_010323 Carica papaya; NC\_026786 Carludovica palmata; NC\_027618 Carnegiea gigantea; NC\_028585 Carteria cerasiformis; NC\_029889 Carum carvi; NC\_029948 Caryota mitis; NC\_014674 Castanea mollissima; NC\_023801 Castanopsis echinocarpa; NC\_021423 Catharanthus roseus; NC\_014589 Cathaya argyrophylla; NC\_026568 Cattleya crispata; NC\_014575 Cedrus deodara; NC\_024171 Cenchrus americanus; NC\_024286 Centaurea diffusa; NC\_025229 Centotheca lappacea; NC\_029411 Centropodia glauca; NC\_021110 Cephalotaxus oliveri; NC\_016063 Cephalotaxus wilsoniana; NC\_009962 Ceratophyllum demersum; NC\_026037 Ceratozamia hildae; NC\_004115 Chaetosphaeridium globosum; NC\_029967 Chamaerops humilis; NC\_008097 Chara vulgaris; NC\_028584 Characiochloris acuminata; NC\_014592 Cheilanthes lindheimeri; NC\_027184 Chikusichloa aquatica; NC\_024714 Chimonocalamus longiusculus; NC\_025230 Chionochloa macra; NC\_005353 Chlamydomonas reinhardtii; NC\_026565 Chloranthus japonicus; NC\_009598 Chloranthus spicatus; NC\_023835 Chlorella sorokiniana; NC\_015359 Chlorella variabilis; NC\_001865 Chlorella vulgaris; NC\_029893 Chloris barbata; NC\_008822 Chlorokybus atmophyticus; NC\_029673 Chlorotetraedron incus; NC\_025539 Choricystis parasitica; NC\_029672 Chromochloris zofingiensis; NC\_020320 Chrysanthemum indicum; NC\_020092 Chrysanthemum x; NC\_024061 Chrysobalanus icaco; NC\_029884 Chrysopogon serrulatus; NC\_029966 Chuniophoenix nana; NC\_027490 Chusquea circinata; NC\_026969 Chusquea liebmannii; NC\_026959 Chusquea spectabilis; NC\_011163 Cicer arietinum; NC\_021111 Cistanche deserticola; NC\_025642 Cistanche phelypaea; NC\_024929 Citrus aurantiifolia; NC\_030194 Citrus platymamma; NC\_008334 Citrus sinensis; NC\_028000 Clematis terniflora; NC\_030314 Closterium baillyanum; NC\_015084 Coccomyxa sp; NC\_029253 Cochlearia borzaeana; NC\_029254 Cochlearia islandica; NC\_029331 Cochlearia pyrenaica; NC\_029332 Cochlearia tridactylites; NC\_022417 Cocos nucifera; NC\_008535 Coffea arabica; NC\_030053 Coffea canephora; NC\_013273 Coix lacryma; NC\_030064 Colchicum autumnale; NC\_025231 Coleataenia prionitis; NC\_030358 Coleochaete scutata; NC\_028080 Colobanthus quitensis; NC\_016753 Colocasia esculenta; NC\_028026 Colpothrinax cookii; NC\_023131 Conopholis americana; NC\_025659 Corallorhiza bulbosa; NC\_025660 Corallorhiza macrantha; NC\_025661 Corallorhiza mertensiana; NC\_025664 Corallorhiza odontorhiza; NC\_025662 Corallorhiza trifida; NC\_025663 Corallorhiza wisteriana; NC\_029850 Coriandrum sativum; NC\_022409 Corymbia eximia; NC\_022407 Corymbia gummifera; NC\_028409 Corymbia henryi; NC\_022408 Corymbia maculata; NC\_022410 Corymbia tessellaris; NC\_028410 Corymbia torelliana; NC\_014807 Corynocarpus laevigata; NC\_029965 Corypha lecomtei; NC\_030357 Cosmarium botrytis; NC\_030547 Couepia caryophylloides; NC\_030548 Couepia grandiflora; NC\_024063 Couepia guianensis; NC\_030549 Couepia ovalifolia; NC\_030550 Couepia paraensis; NC\_030551 Couepia polyandra; NC\_030552 Couepia rankiniae; NC\_030553 Couepia sandwithii; NC\_030554 Couepia subcordata; NC\_009271 Crucihimalaya wallichii; NC\_010548 Cryptomeria japonica; NC\_023544 Cucumis hystrix; NC\_015983 Cucumis melo; NC\_007144 Cucumis sativus; NC\_021437 Cunninghamia lanceolata; NC\_028155 Cupressus gigantea; NC\_026296 Cupressus sempervirens; NC\_028729 Curcuma flaviflora; NC\_022928 Curcuma roscoeana; NC\_009963 Cuscuta exaltata; NC\_009765 Cuscuta gronovii; NC\_009949 Cuscuta obtusiflora; NC\_009766 Cuscuta reflexa; NC\_020319 Cycas revoluta; NC\_009618 Cycas taitungensis; NC\_030359

Cylindrocystis brebissonii; NC\_021429 Cymbidium aloifolium; NC\_028525 Cymbidium ensifolium; NC\_027743 Cymbidium faberi; NC\_028524 Cymbidium goeringii; NC\_029711 Cymbidium kanran; NC\_029712 Cymbidium lancifolium; NC\_029713 Cymbidium macrorhizon; NC\_021433 Cymbidium mannii; NC\_021430 Cymbidium sinense; NC\_021431 Cymbidium tortisepalum; NC\_021432 Cymbidium tracyanum; NC\_030169 Cymbomonas tetramitiformis; NC\_029460 Cynanchum auriculatum; NC\_029459 Cynanchum wilfordii; NC\_028005 Cynara baetica; NC\_028006 Cynara cornigera; NC\_027113 Cynara humilis; NC\_026772 Cypridium formosanum; NC\_027227 Cypridium japonicum; NC\_024421 Cypridium macranthos; NC\_028542 Cyrtomium devexiscapulae; NC\_028705 Cyrtomium falcatum; NC\_030555 Dactyladenia bellayana; NC\_030556 Dactyladenia buchneri; NC\_030557 Dactyladenia floretii; NC\_027473 Dactylis glomerata; NC\_025232 Danthonia californica; NC\_030502 Danthoniopsis dinteri; NC\_020367 Dasypogon bromeliifolius; NC\_018117 Datura stramonium; NC\_008325 Daucus carota; NC\_028549 Dendrobium chrysotoxum; NC\_028430 Dendrobium huoshanense; NC\_029456 Dendrobium nobile; NC\_024019 Dendrobium officinale; NC\_029705 Dendrobium pendulum; NC\_027691 Dendrobium strongylanthum; NC\_013088 Dendrocalamus latiflorus; NC\_026546 Dendropanax dentiger; NC\_027607 Dendropanax morbifer; NC\_023533 Deschampsia antarctica; NC\_026960 Diandrolyra sp; NC\_027474 Diarrhena obovata; NC\_030623 Dichantherium acuminatum; NC\_025546 Diclostera acuata; NC\_025524 Dictyochloropsis reticulata; NC\_027272 Dieffenbachia seguine; NC\_024176 Digitaria exilis; NC\_027512 Dion spinulosum; NC\_009601 Dioscorea elephantipes; NC\_024170 Dioscorea rotundata; NC\_027090 Dioscorea zingiberensis; NC\_029750 Diplopanax stachyanthus; NC\_024158 Diplopterygium glaucum; NC\_029338 Dipteronia sinensis; NC\_029894 Distichlis bajaensis; NC\_029895 Distichlis spicata; NC\_009272 Draba nemorosa; NC\_008456 Drimys granadensis; NC\_029770 Drosera rotundifolia; NC\_026906 Dunalia brachyacantha; NC\_026563 Dunalia obovata; NC\_027099 Dunalia solanacea; NC\_016732 Dunaliella salina; NC\_028719 Echinochloa crus; NC\_029827 Echinochloa frumentacea; NC\_024643 Echinochloa oryzicola; NC\_025655 Echites umbellatus; NC\_028066 Elaeagnus macrophylla; NC\_017602 Elaeis guineensis; NC\_030486 Eleusine indica; NC\_016430 Eleutherococcus senticosus; NC\_027266 Elleanthus sodiroi; NC\_025548 Elliptochloris bilobata; NC\_018541 Elodea canadensis; NC\_025233 Elytrophorus spicatus; NC\_027514 Encephalartos lehmannii; NC\_030313 Entransia fimbriata; NC\_011954 Ephedra equisetina; NC\_029347 Ephedra foeminea; NC\_001568 Epifagus virginiana; NC\_029941 Epimedium acuminatum; NC\_029942 Epimedium dolichostemon; NC\_029943 Epimedium koreanum; NC\_029944 Epimedium lishihchenii; NC\_029945 Epimedium pseudowushanense; NC\_029428 Epimedium sagittatum; NC\_026449 Epipogium aphyllum; NC\_026448 Epipogium roseum; NC\_027954 Epipremnum aureum; NC\_014699 Equisetum arvense; NC\_020146 Equisetum hyemale; NC\_029412 Eragrostis minor; NC\_029413 Eragrostis tef; NC\_029964 Eremospatha macrocarpa; NC\_025234 Eriachne stipacea; NC\_030624 Eriochloa meyeriana; NC\_029882 Eriochrysis cf; NC\_029883 Eriochrysis laxa; NC\_030171 Eriolarynx fasciculata; NC\_026847 Erodium absinthoides; NC\_015083 Erodium carvifolium; NC\_027065 Erodium chrysanthum; NC\_025906 Erodium crassifolium; NC\_025907 Erodium gruinum; NC\_014569 Erodium texanum; NC\_024635 Erodium trifolium; NC\_018114 Erycina pusilla; NC\_030212 Erythranthe lutea; NC\_030601 Erythroxyllum novogranatense; NC\_025532 Ettlia pseudoalveolaris; NC\_022396 Eucalyptus aromaphloia; NC\_022382 Eucalyptus baxteri; NC\_022398 Eucalyptus camaldulensis; NC\_022394 Eucalyptus cladocalyx; NC\_022388 Eucalyptus cloeziana; NC\_022391 Eucalyptus curtisii; NC\_022399 Eucalyptus deglupta; NC\_022380 Eucalyptus delegatensis; NC\_022402 Eucalyptus diversicolor; NC\_022383 Eucalyptus diversifolia; NC\_022385 Eucalyptus elata; NC\_022406 Eucalyptus erythrocorys; NC\_008115 Eucalyptus globulus; NC\_014570 Eucalyptus grandis; NC\_022405 Eucalyptus guilfoylei; NC\_022390 Eucalyptus marginata; NC\_022392 Eucalyptus melliodora; NC\_022404 Eucalyptus microcorys; NC\_022395 Eucalyptus nitens; NC\_022378 Eucalyptus obliqua; NC\_022389 Eucalyptus patens; NC\_022393 Eucalyptus polybractea; NC\_022379 Eucalyptus radiata; NC\_022386 Eucalyptus regnans; NC\_022397 Eucalyptus saligna; NC\_022403 Eucalyptus salmonophloia; NC\_022384 Eucalyptus sieberi; NC\_022400 Eucalyptus spathulata; NC\_022401 Eucalyptus torquata; NC\_022387 Eucalyptus umbra; NC\_022381 Eucalyptus verrucata; NC\_029963 Eugeissona tristis; NC\_027744 Eugenia uniflora; NC\_030503 Eulalia aurea; NC\_028067 Euonymus japonicus;

NC\_029429 Euptelea pleiosperma; NC\_025305 Eustrephus latifolius; NC\_029379 Eutrema botschantzevii; NC\_029378 Eutrema halophilum; NC\_028728 Eutrema heterophyllum; NC\_028170 Eutrema salsugineum; NC\_028727 Eutrema yunnanense; NC\_030558 Exellodendron barbatum; NC\_010776 Fagopyrum esculentum; NC\_027161 Fagopyrum tataricum; NC\_024715 Fargesia nitida; NC\_024716 Fargesia spathacea; NC\_024717 Fargesia yunnanensis; NC\_027685 Fatsia japonica; NC\_015831 Ferrocalamus rimosivaginus; NC\_019648 Festuca altissima; NC\_011713 Festuca arundinacea; NC\_019649 Festuca ovina; NC\_019650 Festuca pratensis; NC\_028185 Ficus racemosa; NC\_014346 Floydella terrestris; NC\_029469 Foeniculum vulgare; NC\_019601 Fragaria chiloensis; NC\_024258 Fragaria iinumae; NC\_018767 Fragaria mandshurica; NC\_015206 Fragaria vesca; NC\_018766 Fragaria vesca; NC\_019602 Fragaria virginiana; NC\_021101 Francoa sonchifolia; NC\_024728 Fritillaria cirrhosa; NC\_024736 Fritillaria hupehensis; NC\_023247 Fritillaria taipaiensis; NC\_025543 Fusochloris perforata; NC\_024718 Gaoligongshania megalothyrsa; NC\_030559 Gaulettia elata; NC\_024719 Gelidocalamus tessellatus; NC\_025544 Geminella minor; NC\_025652 Genlisea margaretae; NC\_027442 Gentiana crassicaulis; NC\_027441 Gentiana straminea; NC\_030319 Gentiana tibetica; NC\_030045 Geranium incanum; NC\_029999 Geranium maderense; NC\_014573 Geranium palmatum; NC\_016986 Ginkgo biloba; NC\_025538 Gloeotilopsis sterilis; NC\_030065 Gloriosa superba; NC\_021647 Glycine canescens; NC\_021645 Glycine cyrtoloba; NC\_021648 Glycine dolichocarpa; NC\_021649 Glycine falcata; NC\_030329 Glycine gracilis; NC\_007942 Glycine max; NC\_022868 Glycine soja; NC\_021646 Glycine stenophita; NC\_021650 Glycine syndetika; NC\_021636 Glycine tomentella; NC\_024038 Glycyrrhiza glabra; NC\_026301 Gnetum gnemon; NC\_021438 Gnetum montanum; NC\_011942 Gnetum parvifolium; NC\_028734 Gnetum ula; NC\_020438 Gonium pectorale; NC\_026773 Goodyera fumata; NC\_029363 Goodyera procera; NC\_029364 Goodyera schlechtendaliana; NC\_029365 Goodyera velutina; NC\_023213 Gossypium anomalum; NC\_016712 Gossypium arboreum; NC\_018112 Gossypium areysianum; NC\_008641 Gossypium barbadense; NC\_023214 Gossypium bickii; NC\_018111 Gossypium capitis; NC\_016670 Gossypium darwinii; NC\_017894 Gossypium gossypoides; NC\_016692 Gossypium herbaceum; NC\_023215 Gossypium herbaceum; NC\_007944 Gossypium hirsutum; NC\_018109 Gossypium incanum; NC\_023216 Gossypium longicalyx; NC\_016711 Gossypium mustelinum; NC\_016668 Gossypium raimondii; NC\_018113 Gossypium robinsonii; NC\_018110 Gossypium somalense; NC\_023217 Gossypium stocksii; NC\_023218 Gossypium sturtianum; NC\_015204 Gossypium thurberi; NC\_016690 Gossypium tomentosum; NC\_026835 Gossypium turneri; NC\_030560 Grangeria borbonica; NC\_026961 Greslania sp; NC\_029749 Guadua angustifolia; NC\_029232 Guadua chacoensis; NC\_026991 Guadua weberbaueri; NC\_010601 Guizotia abyssinica; NC\_030061 Gymnospermium microrrhynchum; NC\_028614 Gynochthodes nanlingensis; NC\_029484 Gynostemma pentaphyllum; NC\_026775 Habenaria pantlingiana; NC\_028583 Hafniomonas laevis; NC\_025235 Hakonechloa macra; NC\_027668 Haloxylon ammodendron; NC\_027669 Haloxylon persicum; NC\_024732 Hanabusaya asiatica; NC\_029962 Hanguana malayana; NC\_029819 Haplostachys haplostachya; NC\_007977 Helianthus annuus; NC\_030275 Helianthus argophyllus; NC\_030173 Helianthus debilis; NC\_023110 Helianthus decapetalus; NC\_023109 Helianthus divaricatus; NC\_023107 Helianthus giganteus; NC\_023108 Helianthus grosseserratus; NC\_023111 Helianthus hirsutus; NC\_023114 Helianthus maximiliani; NC\_023113 Helianthus strumosus; NC\_023112 Helianthus tuberosus; NC\_020362 Heliconia collinsiana; NC\_008100 Helicosporidium sp; NC\_027469 Helictochloa hookeri; NC\_027159 Heloniopsis tubiflora; NC\_025787 Hesperelaea palmeri; NC\_026297 Hesperocyparis glabra; NC\_015308 Hevea brasiliensis; NC\_026909 Hibiscus syriacus; NC\_026962 Hickelia madagascariensis; NC\_027475 Hierochloa odorata; NC\_029415 Hilaria cenchroides; NC\_029896 Hilaria rigida; NC\_030561 Hirtella macrosepala; NC\_024066 Hirtella physophora; NC\_024060 Hirtella racemosa; NC\_030562 Hirtella suffulta; NC\_030563 Hirtella zanzibarica; NC\_027476 Hordeum jubatum; NC\_008590 Hordeum vulgare; NC\_028032 Humulus lupulus; NC\_030564 Hunga gerontogea; NC\_006861 Huperzia lucidula; NC\_029358 Hydнора visseri; NC\_030625 Hyparrhenia subplumosa; NC\_023260 Hypseocharis bilobata; NC\_009600 Illicium oligandrum; NC\_030487 Imperata cylindrica; NC\_015803 Indocalamus longiauritus; NC\_024720 Indocalamus wilsonii; NC\_024721 Indosasa sinica; NC\_028732 Inga leiocalycina; NC\_025542 Interfilum terricola; NC\_029833 Iochroma australe; NC\_029746 Iochroma cardenasianum; NC\_030178



lochroma cyaneum; NC\_030177 lochroma ellipticum; NC\_030167 lochroma lehmannii; NC\_026726 lochroma loxense; NC\_026567 lochroma nitidum; NC\_030168 lochroma salpoanum; NC\_026574 lochroma stenanthum; NC\_027177 lochroma tingoanum; NC\_030044 lochroma umbellatum; NC\_029333 Ionopsidium acaule; NC\_026703 Ipomoea batatas; NC\_009808 Ipomoea purpurea; NC\_024936 Iris gatesii; NC\_029227 Iris sanguinea; NC\_025236 Isachne distichophylla; NC\_028415 Isatis tinctoria; NC\_030488 Ischaemum afrum; NC\_030611 Iseilema macratherum; NC\_014675 Isoetes flaccida; NC\_015543 Jacobaea vulgaris; NC\_008407 Jasminum nudiflorum; NC\_012224 Jatropha curcas; NC\_028582 Jenufa minuta; NC\_028581 Jenufa perforata; NC\_028617 Juglans regia; NC\_024021 Juniperus bermudiana; NC\_028190 Juniperus cedrus; NC\_024022 Juniperus monosperma; NC\_024023 Juniperus scopulorum; NC\_024024 Juniperus virginiana; NC\_022814 Kalopanax septemlobus; NC\_011930 Keteleeria davidiana; NC\_029676 Kirchneriella aperta; NC\_024167 Klebsormidium flaccidum; NC\_025536 Koliella corcontica; NC\_025531 Koliella longiseta; NC\_029874 Kolkwitzia amabilis; NC\_030565 Kostermanthus robustus; NC\_007578 Lactuca sativa; NC\_029808 Lagerstroemia fauriei; NC\_029885 Lagerstroemia guilinensis; NC\_030484 Lagerstroemia indica; NC\_016058 Larix decidua; NC\_028023 Larrea tridentata; NC\_027838 Lathraea squamaria; NC\_027148 Lathyrus clymenum; NC\_027073 Lathyrus davidii; NC\_027074 Lathyrus graminifolius; NC\_027149 Lathyrus inconspicuus; NC\_027075 Lathyrus japonicus; NC\_027076 Lathyrus littoralis; NC\_027077 Lathyrus ochroleucus; NC\_027150 Lathyrus odoratus; NC\_027078 Lathyrus palustris; NC\_027079 Lathyrus pubescens; NC\_014063 Lathyrus sativus; NC\_027151 Lathyrus tingitanus; NC\_027080 Lathyrus venosus; NC\_029370 Lavandula angustifolia; NC\_024106 Lecomtella madagascariensis; NC\_016677 Leersia tisserantii; NC\_030482 Leitneria floridana; NC\_010109 Lemna minor; NC\_027152 Lens culinaris; NC\_027835 Leontopodium leiolepis; NC\_009273 Lepidium virginicum; NC\_027513 Lepidozamia peroffskyana; NC\_009681 Leptosira terrestris; NC\_028733 Leucaena trichandra; NC\_029961 Leucothrinax morrisii; NC\_024064 Licania alba; NC\_030566 Licania canescens; NC\_030567 Licania glabriflora; NC\_024062 Licania heteromorpha; NC\_030568 Licania macrophylla; NC\_030569 Licania majuscula; NC\_030570 Licania membranacea; NC\_030571 Licania michauxii; NC\_030572 Licania micrantha; NC\_030573 Licania minutiflora; NC\_030574 Licania ovalifolia; NC\_024065 Licania sprucei; NC\_030575 Licania tomentosa; NC\_029394 Ligusticum tenuissimum; NC\_029937 Lilium distichum; NC\_027674 Lilium hansonii; NC\_027679 Lilium sp; NC\_026787 Lilium superbum; NC\_027675 Lilium tsingtauense; NC\_022859 Lindenbergia philippensis; NC\_023092 Liquidambar formosana; NC\_030504 Liriodendron chinense; NC\_008326 Liriodendron tulipifera; NC\_026970 Lithachne pauciflora; NC\_026577 Lithocarpus balansae; NC\_025533 Lobosphaera incisa; NC\_009274 Lobularia maritima; NC\_029960 Lodoicea maldivica; NC\_019651 Lolium multiflorum; NC\_009950 Lolium perenne; NC\_026839 Lonicera japonica; NC\_002694 Lotus japonicus; NC\_030612 Loudetiopsis kerstingii; NC\_030540 Ludisia discolor; NC\_023090 Lupinus luteus; NC\_025333 Luzuriaga radicans; NC\_022136 Lygodium japonicum; NC\_026197 Lysimachia coreana; NC\_025288 Macadamia integrifolia; NC\_028074 Machilus balansae; NC\_028073 Machilus yunnanensis; NC\_027511 Macrozamia mountperriensis; NC\_030576 Magnistipula butayei; NC\_023234 Magnolia cathcartii; NC\_018357 Magnolia denudata; NC\_020318 Magnolia grandiflora; NC\_023237 Magnolia kobus; NC\_015892 Magnolia kwangsiensis; NC\_023238 Magnolia liliifera; NC\_020316 Magnolia officinalis; NC\_020317 Magnolia officinalis; NC\_023236 Magnolia pyramidata; NC\_023240 Magnolia salicifolia; NC\_023241 Magnolia sinica; NC\_023242 Magnolia sprengeri; NC\_024027 Magnolia tripetala; NC\_024545 Magnolia yunnanensis; NC\_010433 Manihot esculenta; NC\_017006 Mankyua chejuensis; NC\_030577 Maranthes gabunensis; NC\_030578 Maranthes glabra; NC\_030579 Maranthes kerstingii; NC\_001319 Marchantia polymorpha; NC\_022137 Marsilea crenata; NC\_025549 Marvania geminata; NC\_026541 Masdevallia coccinea; NC\_026777 Masdevallia picturata; NC\_029947 Mauritia flexuosa; NC\_027153 Medicago hybrida; NC\_027154 Medicago papillosa; NC\_012615 Megaleranthis saniculifolia; NC\_030489 Megathyrsus maximus; NC\_027477 Melica mutica; NC\_027478 Melica subulata; NC\_029430 Meliosma aff; NC\_029049 Mesembryanthemum crystallinum; NC\_024169 Mesotaenium endlicherianum; NC\_029214 Metanarthecium luteoviride; NC\_022812 Metapanax delavayi; NC\_027423 Metasequoia glyptostroboides; NC\_029959 Metroxylon warburgii; NC\_023239 Michelia odora; NC\_012575 Micromonas sp; NC\_025537 Microthamnion

kuetzingianum; NC\_016708 Millettia pinnata; NC\_028720 Miscanthus sacchariflorus; NC\_028721 Miscanthus sinensis; NC\_025237 Monachather paradoxus; NC\_012101 Monomastix sp; NW\_014013626 Monoraphidium neglectum; NC\_029704 Monotropa hypopitys; NC\_029694 Monsonia emarginata; NC\_029830 Monsonia marlothii; NC\_014582 Monsonia speciosa; NC\_028009 Morinda officinalis; NC\_008359 Morus indica; NC\_025772 Morus mongolica; NC\_027110 Morus notabilis; NC\_028439 Musa balbisiana; NC\_022926 Musa textilis; NC\_029671 Mychonastes homosphaera; NC\_028579 Mychonastes jurisii; NC\_025525 Myrmecia israelensis; NC\_023120 Nageia nagi; NC\_021936 Najas flexilis; NC\_008336 Nandina domestica; NC\_009275 Nasturtium officinale; NC\_015605 Nelumbo lutea; NC\_025339 Nelumbo nucifera; NC\_030580 Neocarya macrophylla; NC\_029670 Neochloris aquatica; NC\_025535 Neocystis brevis; NC\_026963 Neohouzeaua sp; NC\_026964 Neololeba atra; NC\_016471 Neottia nidus; NC\_024829 Nephroselmis astigmatica; NC\_000927 Nephroselmis olivacea; NC\_025656 Nerium oleander; NC\_030356 Netroium digitus; NC\_024262 Neyraudia reynaudiana; NC\_007500 Nicotiana sylvestris; NC\_001879 Nicotiana tabacum; NC\_007602 Nicotiana tomentosiformis; NC\_016068 Nicotiana undulata; NC\_020259 Nothoceros aenigmaticus; NC\_008788 Nuphar advena; NC\_026979 Nyholmiella obtusifolia; NC\_006050 Nymphaea alba; NC\_024542 Nymphaea mexicana; NC\_029958 Nypa fruticans; NC\_011031 Oedogonium cardiacum; NC\_010358 Oenothera argillicola; NC\_010361 Oenothera biennis; NC\_010360 Oenothera glazioviana; NC\_029211 Oenothera grandiflora; NC\_029212 Oenothera oakesiana; NC\_010362 Oenothera parviflora; NC\_030532 Oenothera villaricae; NC\_015401 Olea europaea; NC\_015604 Olea europaea; NC\_015623 Olea europaea; NC\_013707 Olea europaea; NC\_015608 Olea woodiana; NC\_024722 Oligostachyum shiuyingianum; NC\_009267 Olimarabidopsis pumila; NC\_026965 Olmeca reflexa; NC\_008099 Oltmannsiellopsis viridis; NC\_024165 Olyra latifolia; NC\_014056 Oncidium Gower; NC\_028148 Oncidium sphacelatum; NC\_025657 Oncinotis tenuiloba; NC\_030490 Oncorachis ramosa; NC\_028580 Oogamochlamys gigantea; NC\_020147 Ophioglossum californicum; NC\_030491 Oplismenus hirtellus; NC\_025651 Orobanche californica; NC\_024845 Orobanche crenata; NC\_023464 Orobanche gracilis; NC\_026212 Orthotrichum rogeri; NC\_024608 Oryza australiensis; NC\_027460 Oryza barthii; NC\_030596 Oryza brachyantha; NC\_024175 Oryza glaberrima; NC\_027461 Oryza glumipatula; NC\_027462 Oryza longistaminata; NC\_016927 Oryza meridionalis; NC\_030298 Oryza minuta; NC\_005973 Oryza nivara; NC\_027463 Oryza officinalis; NC\_027676 Oryza punctata; NC\_017835 Oryza rufipogon; NC\_001320 Oryza sativa; NC\_008155 Oryza sativa; NC\_027678 Oryza sativa; NC\_027479 Oryzopsis asperifolia; NC\_024157 Osmundastrum cinnamomeum; NC\_028618 Ostericum grosseserratum; NC\_008289 Ostreococcus tauri; NC\_028349 Ostrya rehderiana; NC\_027960 Osyris alba; NC\_030492 Otachyrium versicolor; NC\_026971 Otatea acuminata; NC\_028631 Otatea glauca; NC\_025529 Pabia signiensis; NC\_021102 Pachycladon cheesemani; NC\_018565 Pachycladon enysii; NC\_029433 Pachysandra terminalis; NC\_026076 Paeonia obovata; NC\_006290 Panax ginseng; NC\_028703 Panax japonicus; NC\_026447 Panax notoginseng; NC\_027456 Panax quinquefolius; NC\_030598 Panax stipuleanatus; NC\_028704 Panax vietnamensis; NC\_030493 Panicum capillare; NC\_029732 Panicum miliaceum; NC\_015990 Panicum virgatum; NC\_029434 Papaver somniferum; NC\_026779 Paphiopedilum armeniacum; NC\_026776 Paphiopedilum niveum; NC\_012978 Parachlorella kessleri; NC\_025540 Paradoxia multisetata; NC\_030517 Parastemon urophyllus; NC\_027491 Pariana campestris; NC\_026972 Pariana radiceflora; NC\_024067 Parinari campestris; NC\_030581 Parinari capensis; NC\_030582 Parinari curatellifolia; NC\_030583 Parinari oblongifolia; NC\_024560 Paris verticillata; NC\_013553 Parthenium argentatum; NC\_030494 Paspalidium geminatum; NC\_030614 Paspalum dilatatum; NC\_030495 Paspalum fimbriatum; NC\_030496 Paspalum glaziovii; NC\_027450 Pastinaca pimpinellifolia; NC\_029700 Pedicularis ishidozana; NC\_016733 Pedinomonas minor; NC\_025530 Pedinomonas tuberculata; NC\_023261 Pelargonium alternans; NC\_028053 Pelargonium australe; NC\_028052 Pelargonium cotyledonis; NC\_028051 Pelargonium dichondrifolium; NC\_008454 Pelargonium x; NC\_019628 Pellia endiviifolia; NC\_016921 Pentactina rupicola; NC\_025658 Pentalinon luteum; NC\_023086 Penthorum chinense; NC\_023356 Petrosavia stellaris; NC\_028587 Phacotus lenticularis; NC\_027480 Phaenosperma globosum; NC\_007499 Phalaenopsis aphrodite; NC\_017609 Phalaenopsis equestris; NC\_025593 Phalaenopsis hybrid; NC\_027481 Phalaris arundinacea; NC\_023245 Pharus lappulaceus; NC\_021372 Pharus latifolius;

NC\_009259 Phaseolus vulgaris; NC\_023132 Phelipanche purpurea; NC\_023465 Phelipanche ramosa; NC\_027482 Phleum alpinum; NC\_013991 Phoenix dactylifera; NC\_028149 Phragmipedium longifolium; NC\_022958 Phragmites australis; NC\_015817 Phyllostachys edulis; NC\_015826 Phyllostachys nigra; NC\_016699 Phyllostachys propinqua; NC\_024669 Phyllostachys sulphurea; NC\_029820 Phyllostegia velutina; NC\_026570 Physalis peruviana; NC\_005087 Physcomitrella patens; NC\_029957 Phytelephas aequatorialis; NC\_021456 Picea abies; NC\_029374 Picea jezoensis; NC\_016069 Picea morrisonicola; NC\_011152 Picea sitchensis; NC\_024828 Picocystis salinarum; NC\_029956 Pigafetta elata; NC\_029235 Pilostyles aethiopica; NC\_029236 Pilostyles hamiltonii; NC\_027681 Pinellia ternata; NC\_023463 Pinguicula ehlersiae; NC\_029847 Pinus armandii; NC\_028421 Pinus bungeana; NC\_011153 Pinus contorta; NC\_011154 Pinus gerardiana; NC\_004677 Pinus koraiensis; NC\_011155 Pinus krempfii; NC\_011156 Pinus lambertiana; NC\_011157 Pinus longaeva; NC\_021439 Pinus massoniana; NC\_011158 Pinus monophylla; NC\_011159 Pinus nelsonii; NC\_028552 Pinus sibirica; NC\_026302 Pinus strobus; NC\_028531 Pinus tabuliformis; NC\_021440 Pinus taeda; NC\_027415 Pinus taiwanensis; NC\_001631 Pinus thunbergii; NC\_008457 Piper cenocladum; NC\_027941 Piper kadsura; NC\_027483 Piptochaetium avenaceum; NC\_014057 Pisum sativum; NC\_030497 Plagiantha tenella; NC\_025541 Planctonema lauterbornii; NC\_028519 Plantago maritima; NC\_028520 Plantago media; NC\_008335 Platanus occidentalis; NC\_024723 Pleioblastus maculatus; NC\_021109 Pleodorina starrii; NC\_027484 Poa palustris; NC\_023805 Podocarpus lambertii; NC\_020361 Podocarpus totara; NC\_027276 Podococcus barteri; NC\_029881 Pogonatherum paniceum; NC\_028429 Polygonatum cyrtoneura; NC\_029485 Polygonatum sibiricum; NC\_028523 Polygonatum verticillatum; NC\_008235 Populus alba; NC\_024735 Populus balsamifera; NC\_024747 Populus euphratica; NC\_024734 Populus fremontii; NC\_027425 Populus tremula; NC\_028504 Populus tremula; NC\_009143 Populus trichocarpa; NC\_029814 Potamogeton perfoliatus; NC\_024817 Prasinoderma coloniale; NC\_023833 Praxelis clematidea; NC\_026291 Premna microphylla; NC\_024543 Primula poissonii; NC\_030609 Primula sinensis; NC\_021455 Prinsepia utilis; NC\_029955 Pritchardia thurstonii; NC\_023956 Prunus kansuensis; NC\_026981 Prunus maximowiczii; NC\_023798 Prunus mume; NC\_026982 Prunus padus; NC\_014697 Prunus persica; NC\_030599 Prunus pseudocerasus; NC\_026980 Prunus yedoensis; NC\_008114 Pseudendoclonium akinetum; NC\_025547 Pseudochloris wilhelmii; NC\_030631 Pseudolarix amabilis; NC\_029669 Pseudomuriella schumacherensis; NC\_020364 Pseudophoenix vinifera; NC\_028328 Pseudosasa japonica; NC\_016064 Pseudotsuga sinensis; NC\_003386 Psilotum nudum; NC\_014348 Pteridium aquilinum; NC\_015402 Ptilidium pulcherrimum; NC\_027485 Puccinellia nuttalliana; NC\_023449 Puelia olyrififormis; NC\_030516 Pugionium cornutum; NC\_030515 Pugionium dolabratum; NC\_012097 Pycnococcus provasolii; NC\_012099 Pyramimonas parkeae; NC\_015996 Pyrus pyrifolia; NC\_023130 Pyrus spinosa; NC\_026790 Quercus aliena; NC\_026913 Quercus aquifolioides; NC\_029490 Quercus baronii; NC\_020152 Quercus rubra; NC\_026907 Quercus spinosa; NC\_026966 Raddia brasiliensis; NC\_008796 Ranunculus macranthus; NC\_022927 Ravenala madagascariensis; NC\_024827 Retrophyllum piresii; NC\_024292 Rhazya stricta; NC\_027728 Rheum palmatum; NC\_014874 Rhizanthella gardneri; NC\_016718 Rhynchospora subulata; NC\_016736 Ricinus communis; NC\_027259 Rosmarinus officinalis; NC\_030615 Rottboellia cochinchinensis; NC\_024168 Roya anglica; NC\_030315 Roya obtusa; NC\_026444 Sabal domingensis; NC\_029431 Sabia yunnanensis; NC\_005878 Saccharum hybrid; NC\_006084 Saccharum hybrid; NC\_029221 Saccharum hybrid; NC\_029815 Sagittaria lichuanensis; NC\_029954 Salacca ramosiana; NC\_027226 Salicornia bigelovii; NC\_027224 Salicornia brachiata; NC\_027225 Salicornia europaea; NC\_028350 Salix babylonica; NC\_024681 Salix interior; NC\_026462 Salix suchowensis; NC\_020431 Salvia miltiorrhiza; NC\_025668 Sanionia uncinata; NC\_025554 Sapindus mukorossi; NC\_026694 Saracha punctata; NC\_024713 Sarocalamus faberi; NC\_027147 Sartidia dewinteri; NC\_027146 Sartidia perrieri; NC\_029465 Saussurea involucrata; NC\_022813 Schefflera delavayi; NC\_029764 Schefflera heptaphylla; NC\_029807 Scherffelia dubia; NC\_015645 Schizomeris leibleinii; NC\_028726 Schrenkiella parvula; NC\_023115 Schwalbea americana; NC\_029734 Sciadopitys verticillata; NC\_027659 Sciaphila densiflora; NC\_030282 Scopolia parviflora; NC\_026202 Scrophularia takesimensis; NC\_027262 Scutellaria baicalensis; NC\_028533 Scutellaria insignis; NC\_021761 Secale cereale; NC\_027837 Sedum oryzifolium; NC\_023085 Sedum sarmentosum;

NC\_026065 *Sedum takesimense*; NC\_013086 *Selaginella moellendorffii*; NC\_030193 *Senna tora*;  
NC\_030372 *Sequoia sempervirens*; NC\_029953 *Serenoa repens*; NC\_016433 *Sesamum indicum*;  
NC\_027451 *Seseli montanum*; NC\_022850 *Setaria italica*; NC\_028075 *Setaria viridis*; NC\_023359  
*Silene chalconica*; NC\_016729 *Silene conica*; NC\_023358 *Silene conoidea*; NC\_016730 *Silene*  
*latifolia*; NC\_016728 *Silene noctiflora*; NC\_023360 *Silene paradoxa*; NC\_016727 *Silene vulgaris*;  
NC\_028027 *Silybum marianum*; NC\_027732 *Sinopodophyllum hexandrum*; NC\_028209 *Sobralia*  
aff; NC\_028147 *Sobralia callosa*; NC\_007943 *Solanum bulbocastanum*; NC\_026876 *Solanum*  
*cheesmaniae*; NC\_026877 *Solanum chilense*; NC\_028069 *Solanum commersonii*; NC\_026878  
*Solanum galapagense*; NC\_026879 *Solanum habrochaites*; NC\_007898 *Solanum lycopersicum*;  
AC\_000188 *Solanum lycopersicum*; NC\_030207 *Solanum melongena*; NC\_026880 *Solanum*  
*neorickii*; NC\_028070 *Solanum nigrum*; NC\_026881 *Solanum peruvianum*; NC\_026882 *Solanum*  
*pimpinellifolium*; NC\_008096 *Solanum tuberosum*; NC\_030498 *Sorghastrum nutans*; NC\_008602  
*Sorghum bicolor*; NC\_023800 *Sorghum timorense*; NC\_030371 *Spathiphyllum kochii*; NC\_030198  
*Sphagnum palustre*; NC\_002202 *Spinacia oleracea*; NC\_015891 *Spirodela polyrhiza*; NC\_030355  
*Spirogyra maxima*; NC\_030526 *Spondias bahiensis*; NC\_030527 *Spondias tuberosa*; NC\_029417  
*Sporobolus heterolepis*; NC\_027650 *Sporobolus maritimus*; NC\_029416 *Sporobolus*  
*michauxianus*; NC\_029825 *Stachys byzantina*; NC\_029822 *Stachys chamissonis*; NC\_029823  
*Stachys coccinea*; NC\_029824 *Stachys sylvatica*; NC\_026041 *Stangeria eriopus*; NC\_008116  
*Staurostrum punctulatum*; NC\_030499 *Steinchisma laxum*; NC\_029818 *Stenogyne bifida*;  
NC\_029817 *Stenogyne haliakalae*; NC\_029821 *Stenogyne kanehoana*; NC\_029432 *Stephania*  
*japonica*; NC\_025527 *Stichococcus bacillaris*; NC\_008372 *Stigeoclonium helveticum*; NC\_027464  
*Stipa hymenoides*; NC\_028444 *Stipa lipskyi*; NC\_029390 *Stipa purpurea*; NC\_022414 *Stockwellia*  
*quadrifida*; NC\_030539 *Styrax grandiflorus*; NC\_030260 *Swida controversa*; NC\_029241 *Syagrus*  
*coronata*; NC\_012052 *Syntrichia ruralis*; NC\_029952 *Tahina spectabilis*; NC\_016065 *Taiwania*  
*cryptomerioides*; NC\_021441 *Taiwania flousiana*; NC\_028738 *Takakia lepidozoides*; NC\_030195  
*Talipariti hamabo*; NC\_027955 *Tanaecium tetragonolobum*; NC\_020321 *Taxus mairei*;  
NC\_020098 *Tectona grandis*; NC\_029897 *Tenaxia guillarmodiae*; NC\_021425 *Tetracentron*  
*sinense*; NC\_024291 *Tetraphis pellucida*; NC\_029339 *Tetrastigma hemsleyanum*; NC\_026103  
*Thalictrum coreanum*; NC\_024724 *Thamnocalamus spathiflorus*; NC\_014676 *Theobroma cacao*;  
NC\_030616 *Thyridolepis xerophila*; NC\_025238 *Thysanolaena latifolia*; NC\_028588 *Tilia*  
*amurensis*; NC\_028589 *Tilia mandshurica*; NC\_028590 *Tilia oliveri*; NC\_028591 *Tilia*  
*paucicostata*; NC\_029813 *Tofieldia thibetica*; NC\_029398 *Torreya fargesii*; NC\_027486  
*Torreyochloa pallida*; NC\_010442 *Trachelium caeruleum*; NC\_018569 *Trebouxiophyceae* sp;  
NC\_028578 *Treubaria triappendiculata*; NC\_024035 *Trifolium aureum*; NC\_025743 *Trifolium*  
*boissieri*; NC\_025744 *Trifolium glanduliferum*; NC\_024034 *Trifolium grandiflorum*; NC\_024166  
*Trifolium meduseum*; NC\_024036 *Trifolium repens*; NC\_025745 *Trifolium strictum*; NC\_011828  
*Trifolium subterraneum*; NC\_023959 *Trigonobalanus doichangensis*; NC\_027185 *Trillium*  
*cuneatum*; NC\_027282 *Trillium decumbens*; NC\_027738 *Trillium maculatum*; NC\_027739 *Trillium*  
*tschonoskii*; NC\_027487 *Trisetum cernuum*; NC\_029951 *Trithrinax brasiliensis*; NC\_020372  
*Trithuria inconspicua*; NC\_002762 *Triticum aestivum*; NC\_025955 *Triticum macha*; NC\_021760  
*Triticum monococcum*; NC\_024764 *Triticum timopheevii*; NC\_024814 *Triticum turgidum*;  
NC\_021762 *Triticum urartu*; NC\_021426 *Trochodendron aralioides*; NC\_030630 *Tsuga chinensis*;  
NC\_026796 *Tydemania expeditionis*; NC\_013823 *Typha latifolia*; NC\_029040 *Ulva fasciata*;  
NC\_030312 *Ulva linza*; NC\_030067 *Urochloa brizantha*; NC\_030066 *Urochloa decumbens*;  
NC\_030069 *Urochloa humidicola*; NC\_030617 *Urochloa reptans*; NC\_030068 *Urochloa*  
*ruziziensis*; NC\_021449 *Utricularia gibba*; NC\_025653 *Utricularia macrorhiza*; NC\_029719  
*Utricularia reniformis*; NC\_019616 *Vaccinium macrocarpon*; NC\_026778 *Vanilla planifolia*;  
NC\_029950 *Veitchia arecina*; NC\_022715 *Veratrum patulum*; NC\_030220 *Verdigellas peltata*;  
NC\_027155 *Vicia sativa*; NC\_021091 *Vigna angularis*; NC\_013843 *Vigna radiata*; NC\_018051  
*Vigna unguiculata*; NC\_026986 *Viola seoulensis*; NC\_028012 *Viscum album*; NC\_027959 *Viscum*  
*crassulae*; NC\_027829 *Viscum minimum*; NC\_029454 *Vitis aestivalis*; NC\_023790 *Vitis*  
*rotundifolia*; NC\_007957 *Vitis vinifera*; NC\_029949 *Wallichia densiflora*; NC\_029974 *Washingtonia*  
*robusta*; NC\_025526 *Watanabea reniformis*; NC\_010654 *Welwitschia mirabilis*; NC\_030618  
*Whiteochloa capillipes*; NC\_027677 *Wisteria floribunda*; NC\_029406 *Wisteria sinensis*;  
NC\_015899 *Wolffia australiana*; NC\_015894 *Wolffiella lingulata*; NC\_027235 *Wollemia nobilis*;

NC\_028543 *Woodwardia unigemmata*; NC\_027158 *Xerophyllum tenax*; NC\_025534 *Xylochloris irregularis*; NC\_024725 *Yushania levigata*; NC\_026040 *Zamia furfuracea*; NC\_027939 *Zanthoxylum piperitum*; NC\_030377 *Zea diploperennis*; NC\_030301 *Zea luxurians*; NC\_001666 *Zea mays*; NC\_030300 *Zea perennis*; NC\_030500 *Zeugites pittieri*; NC\_020363 *Zingiber spectabile*; NC\_026967 *Zizania aquatica*; NC\_029401 *Zizania latifolia*; NC\_030299 *Ziziphus jujuba*; NC\_029418 *Zoysia macrantha*; NC\_008117 *Zygnema circumcarinatum*

**Figure S1. A log-log scale graph showing the mitochondrial genome size (in kb) versus (a) total length of MTPTs in kb, (b) total number of MTPTs, or (c) MTPT mtDNA % coverage. Outliers are labeled on the plots. Supporting data is shown in supplementary Table S1. Results from the Spearman non-parametric test are show within each plot.**

a.

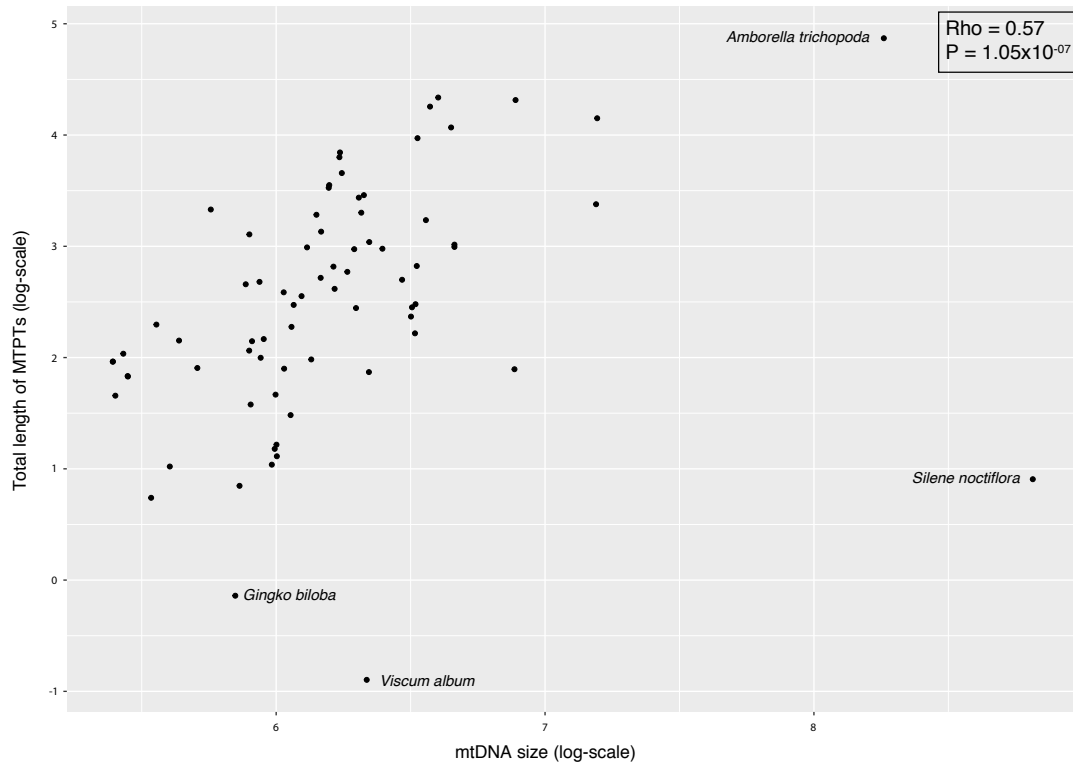

b.

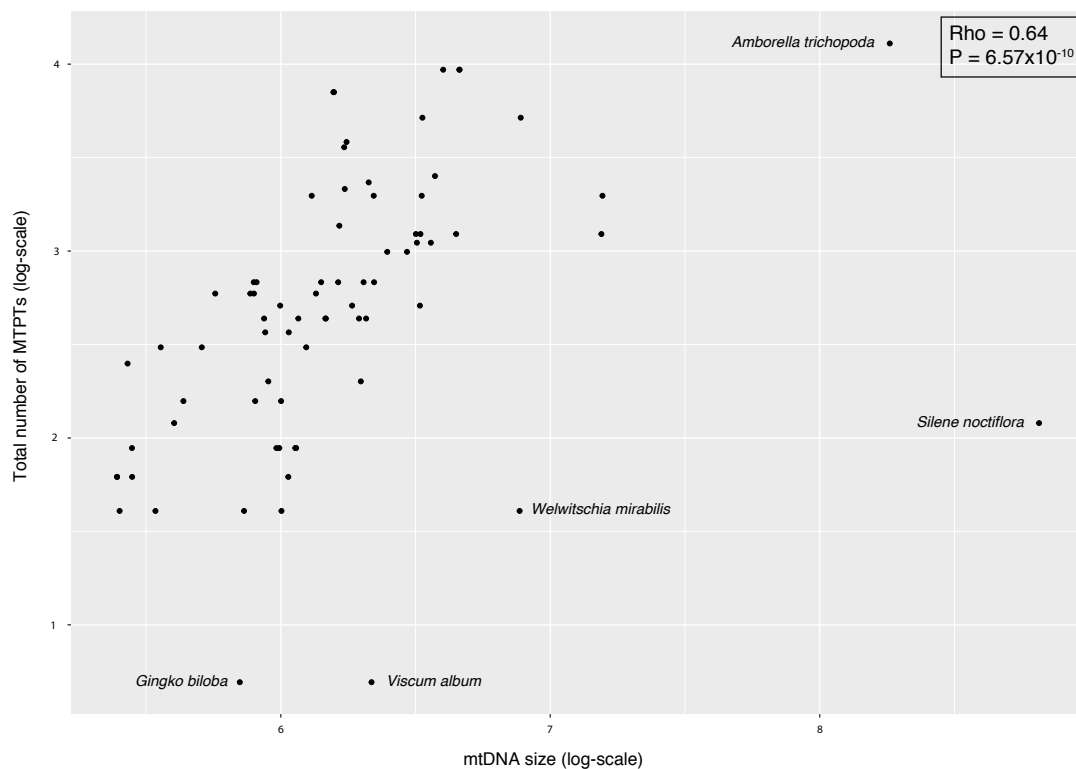

C.

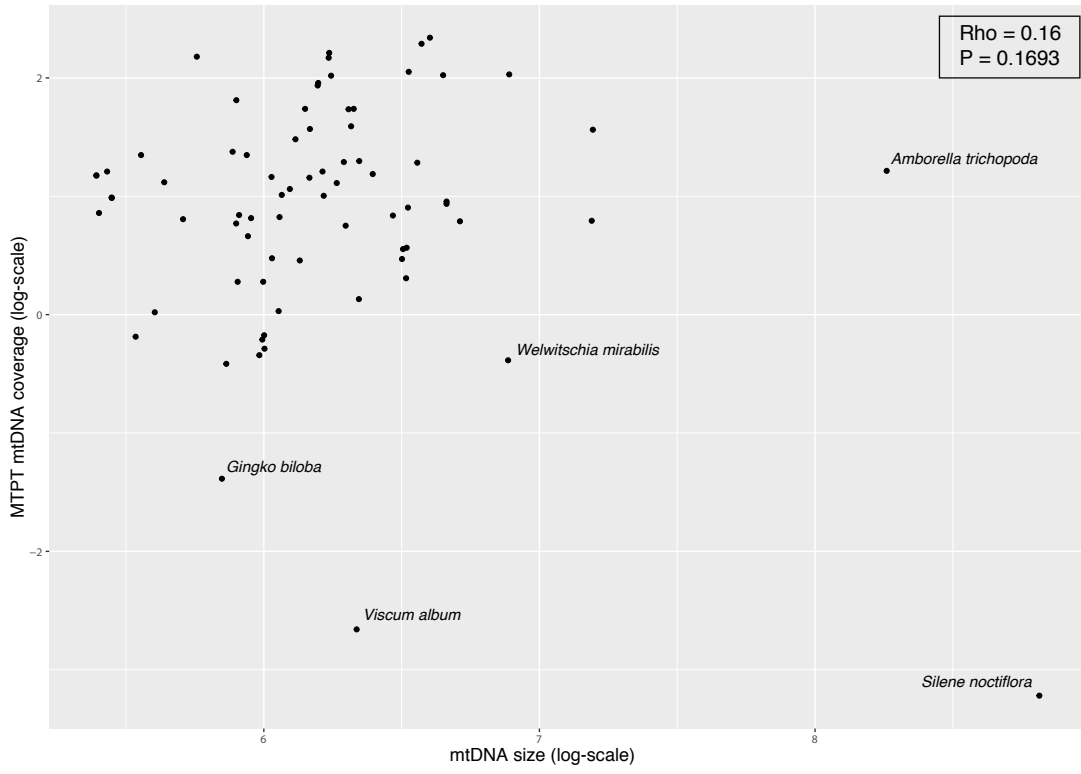

**Figure S2. Best trees of foreign plastid sequences in mitochondrial genomes of angiosperms.** Trees were constructed using RAXML v.8.0.0 under the GTRGAMMA model. Each tree was rooted with *Amborella trichopoda*, if available. Bootstrap support values (1,000 replicates) >50% are shown above the branches. MPTTs and plastid-encoded sequences of the recipient, or the closest species to the recipient, are shown in black and grey bold face, respectively.

a. *Asclepias syriaca* (1) *ndhB-1* (340 nt); (2) *ndhB-1-rps7-rps12* (2,083 nt); (3) non-coding region between *rps7* and *trnV-GAC* (1,281 nt)

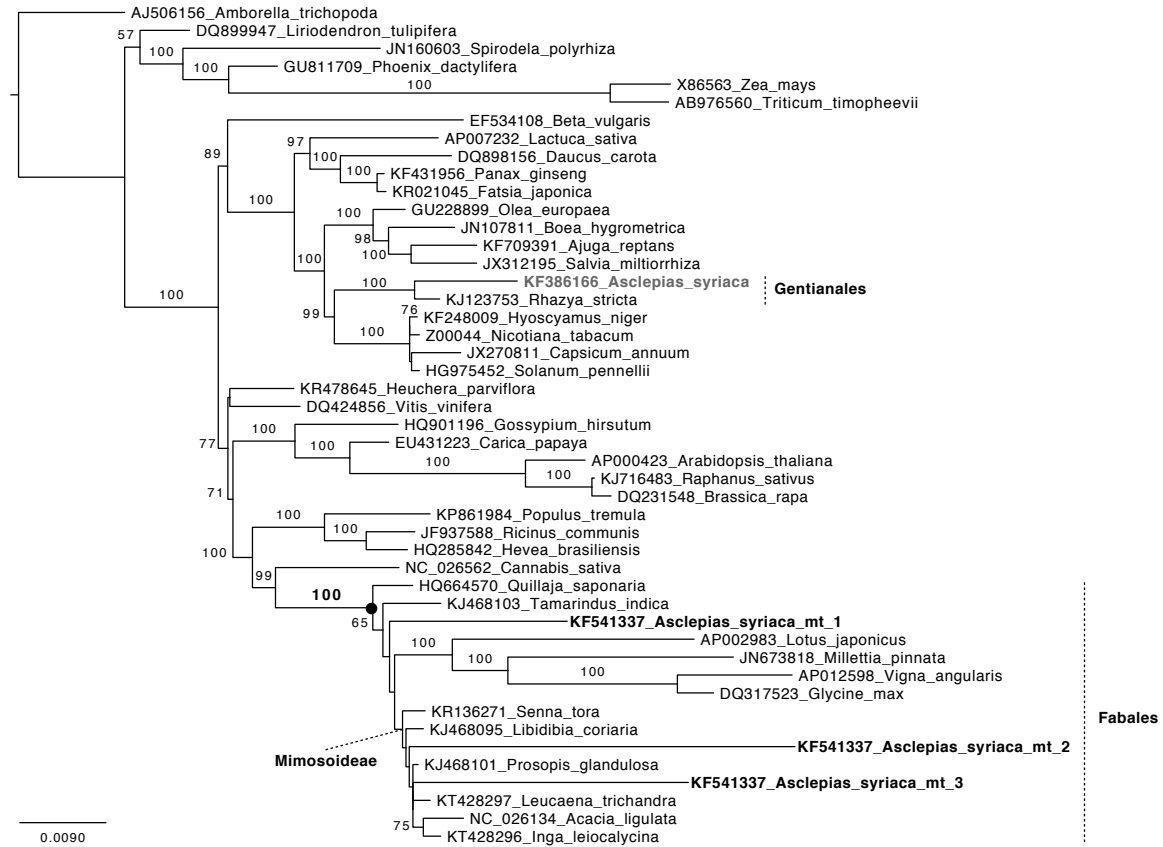



b. *Asclepias syriaca*, *ndhD* (278 nt)

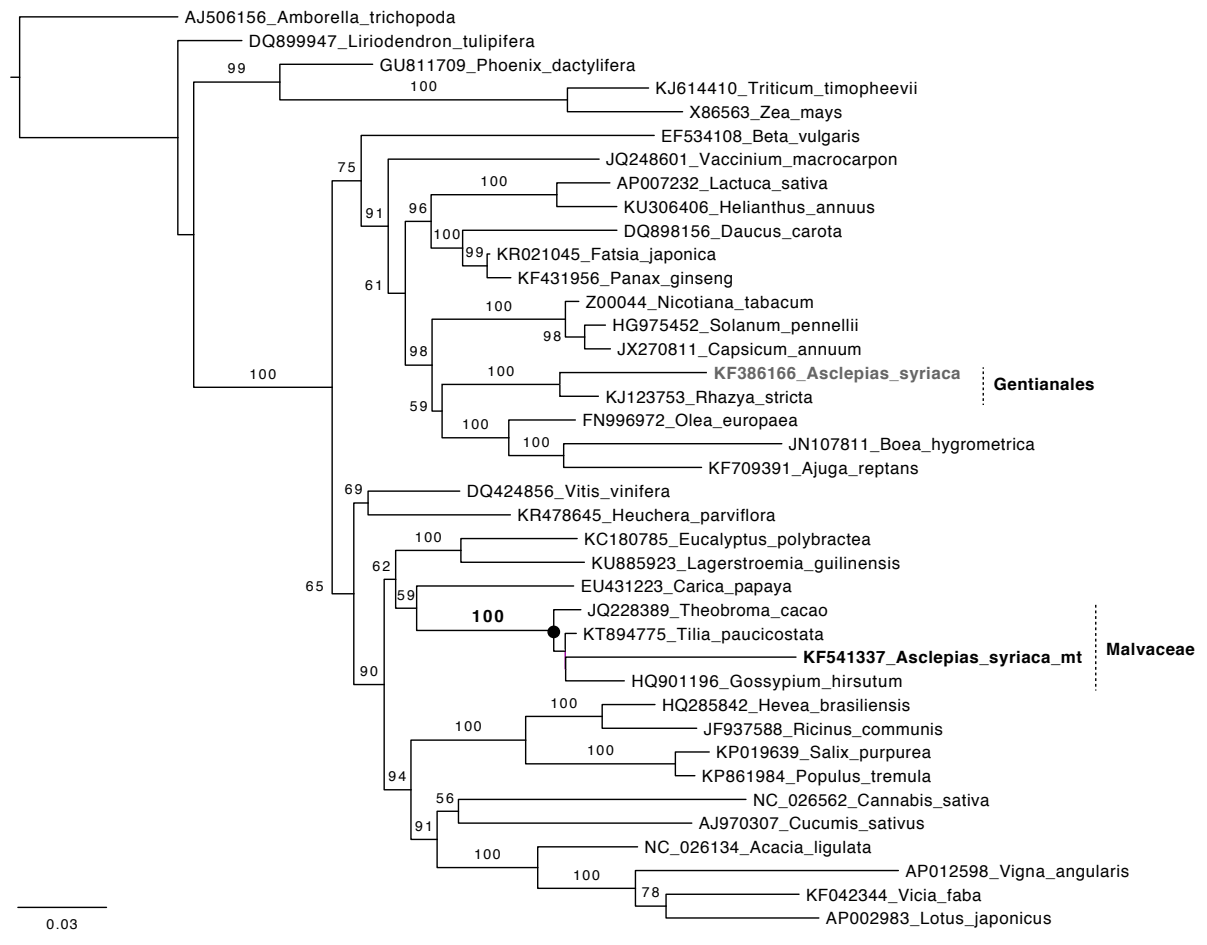

c. *Cucurbita pepo*, *cemA-petA* (1,025 nt)

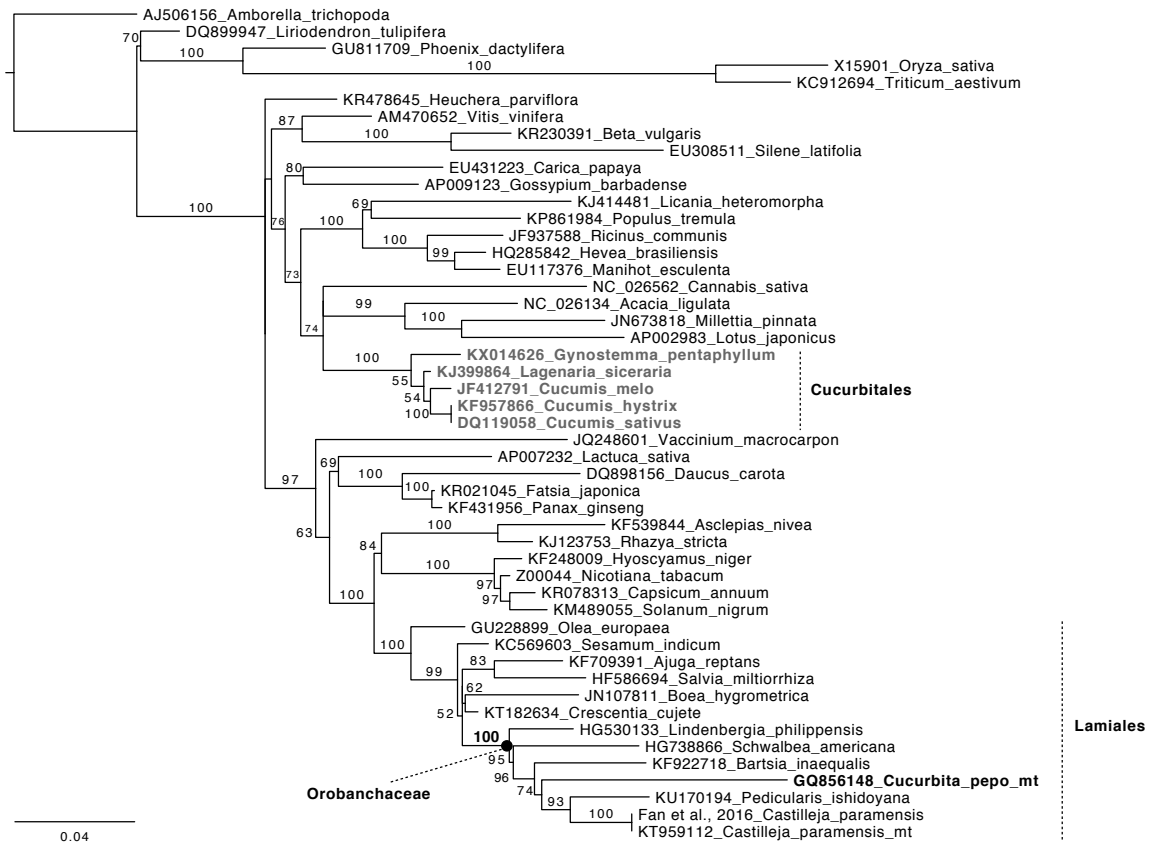

d. *Cucurbita pepo*, *rps7* (1,332 nt)

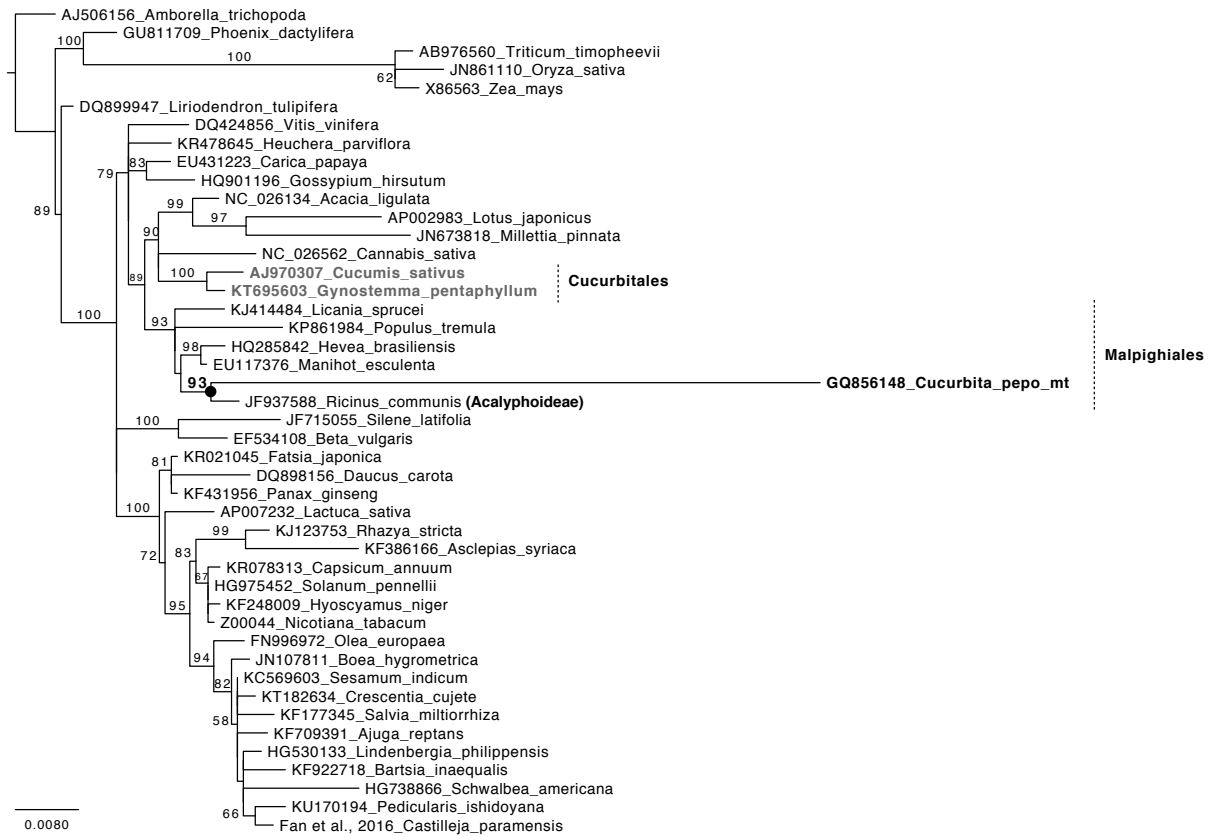

e. *Erythranthe guttata* (*Mimulus guttatus*), *rps7* (348 nt)

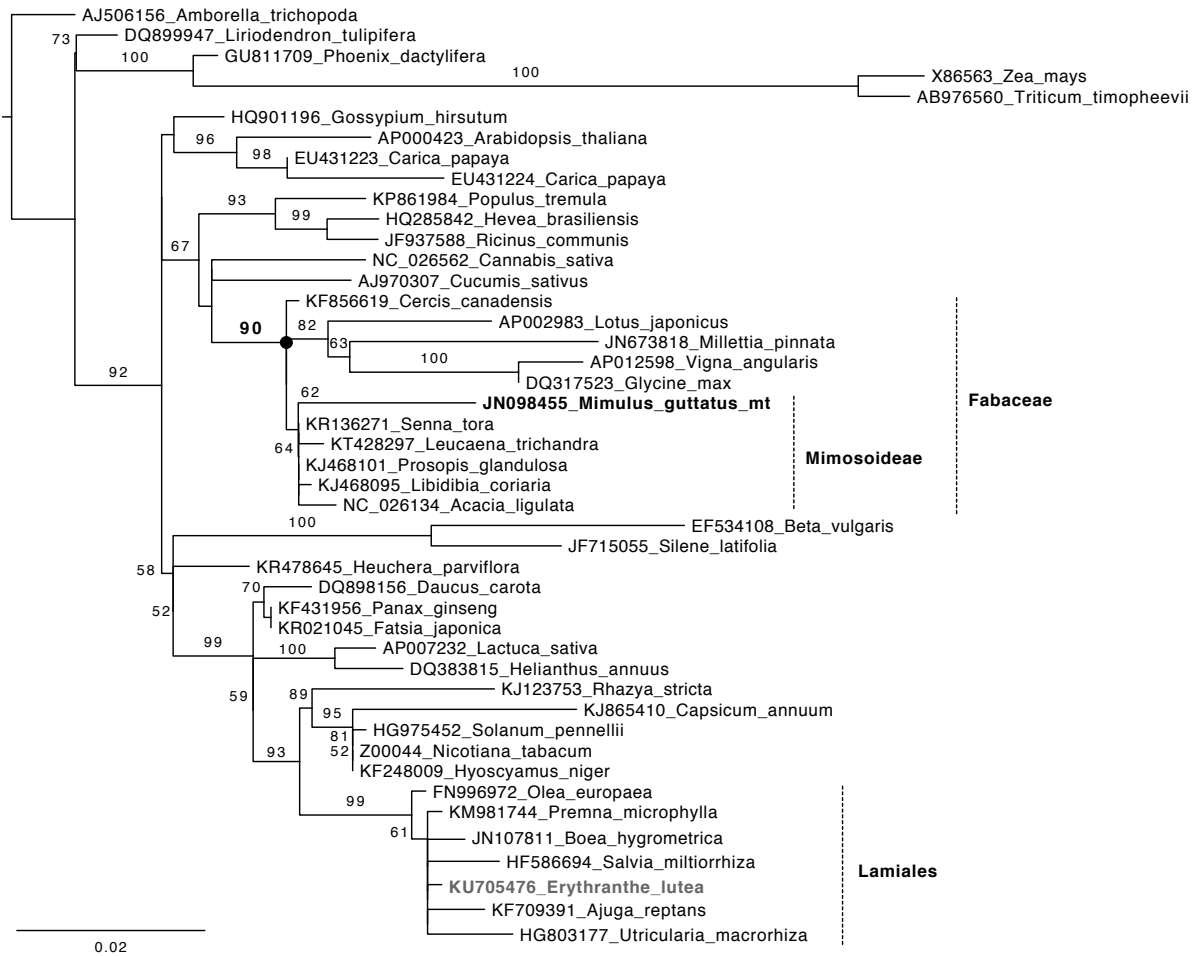

f. *Geranium maderense*, *trnA-Gly*, *trnG-trnR* (376 nt)

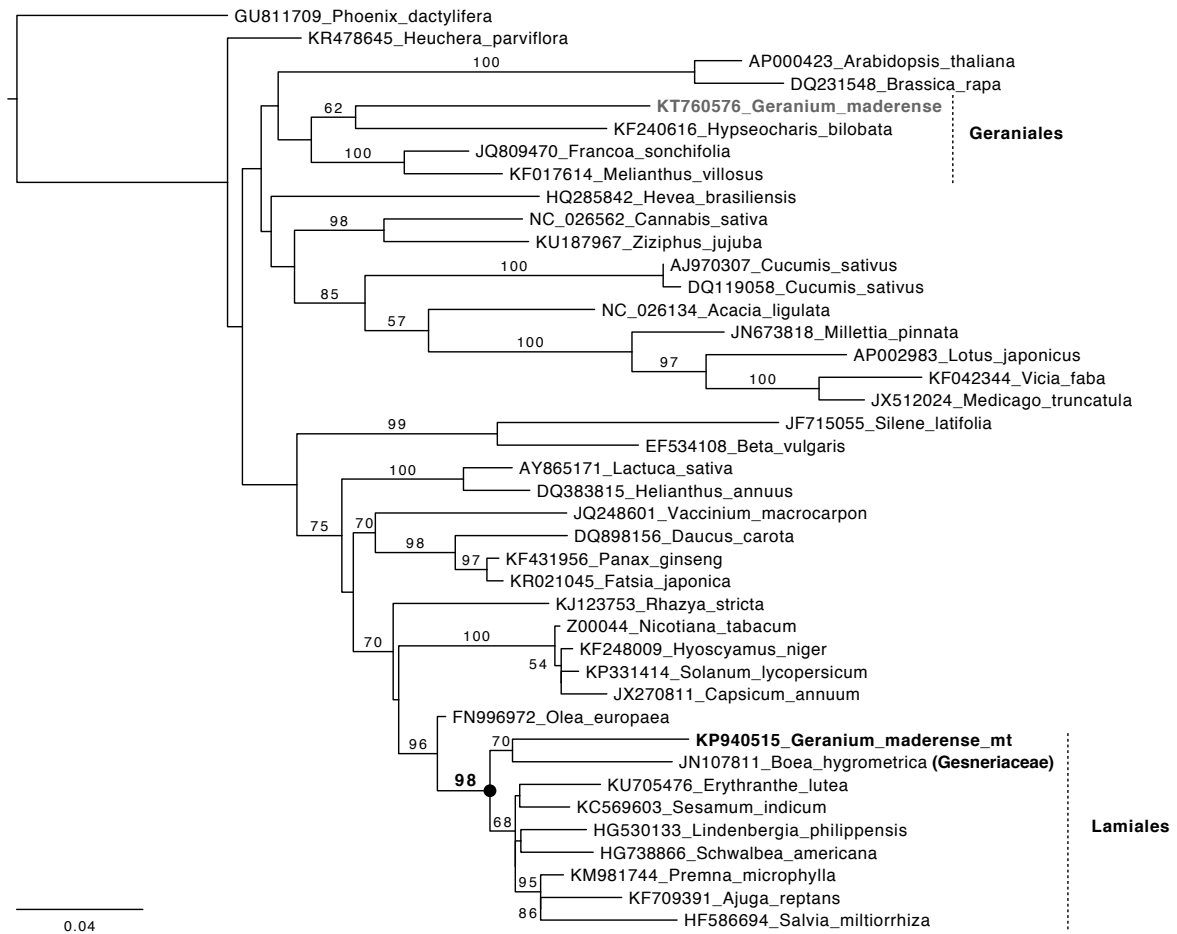

g. *Gossypium hirsutum*, *Gossypium harknessii*, *psbD* (223 nt)

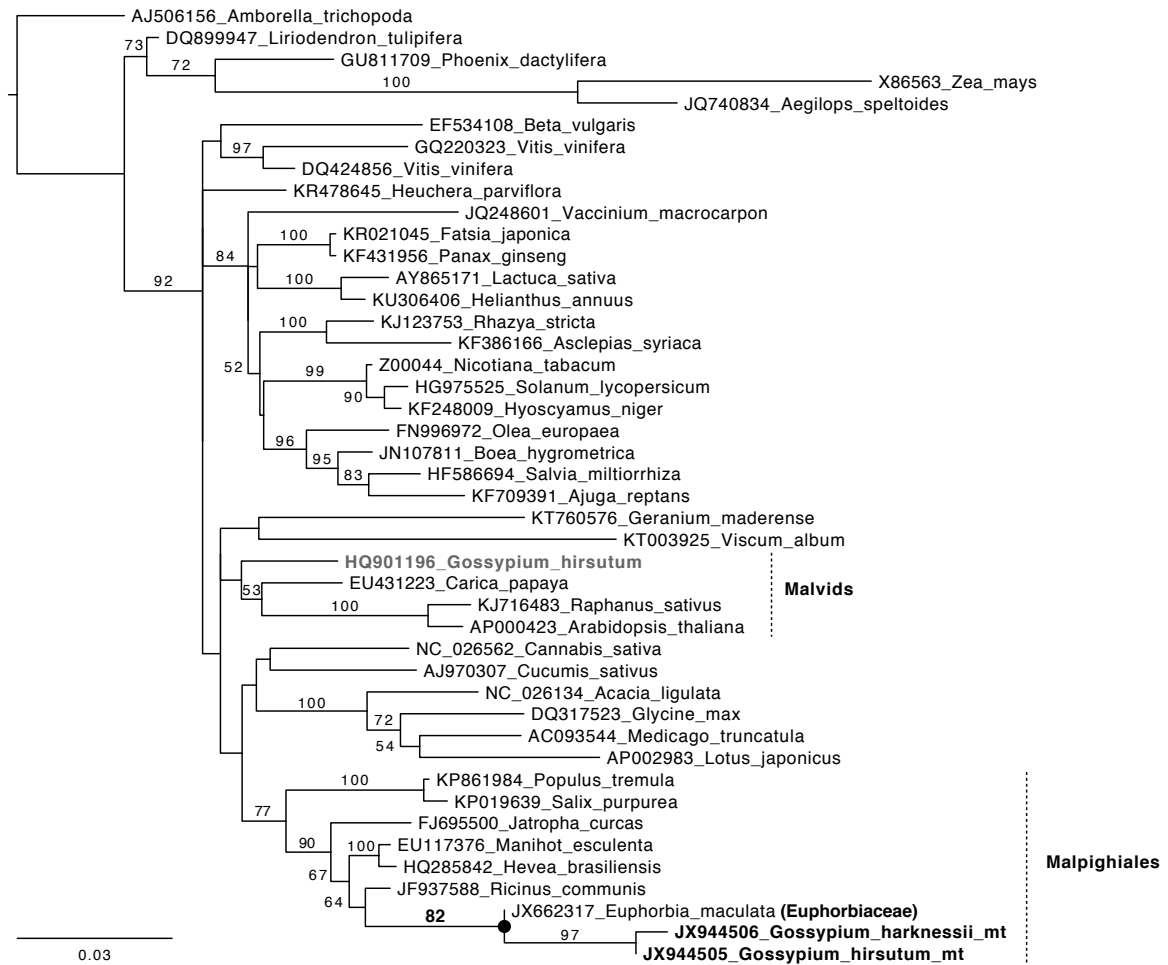

h. *Helianthus annuus*, *infA-rps8*; *rps11* (646 nt)

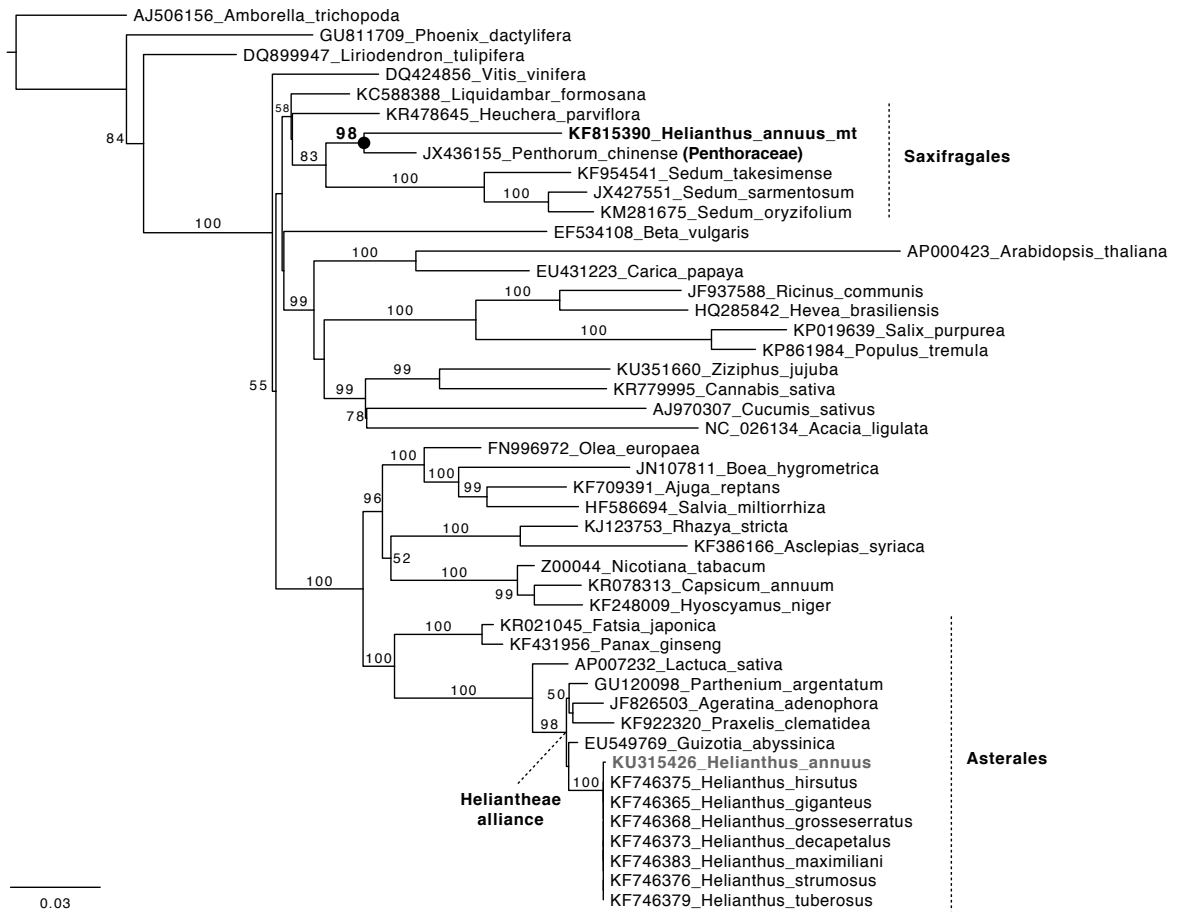

i. *Hyoscyamus niger*, *rps12* (1,974 nt)

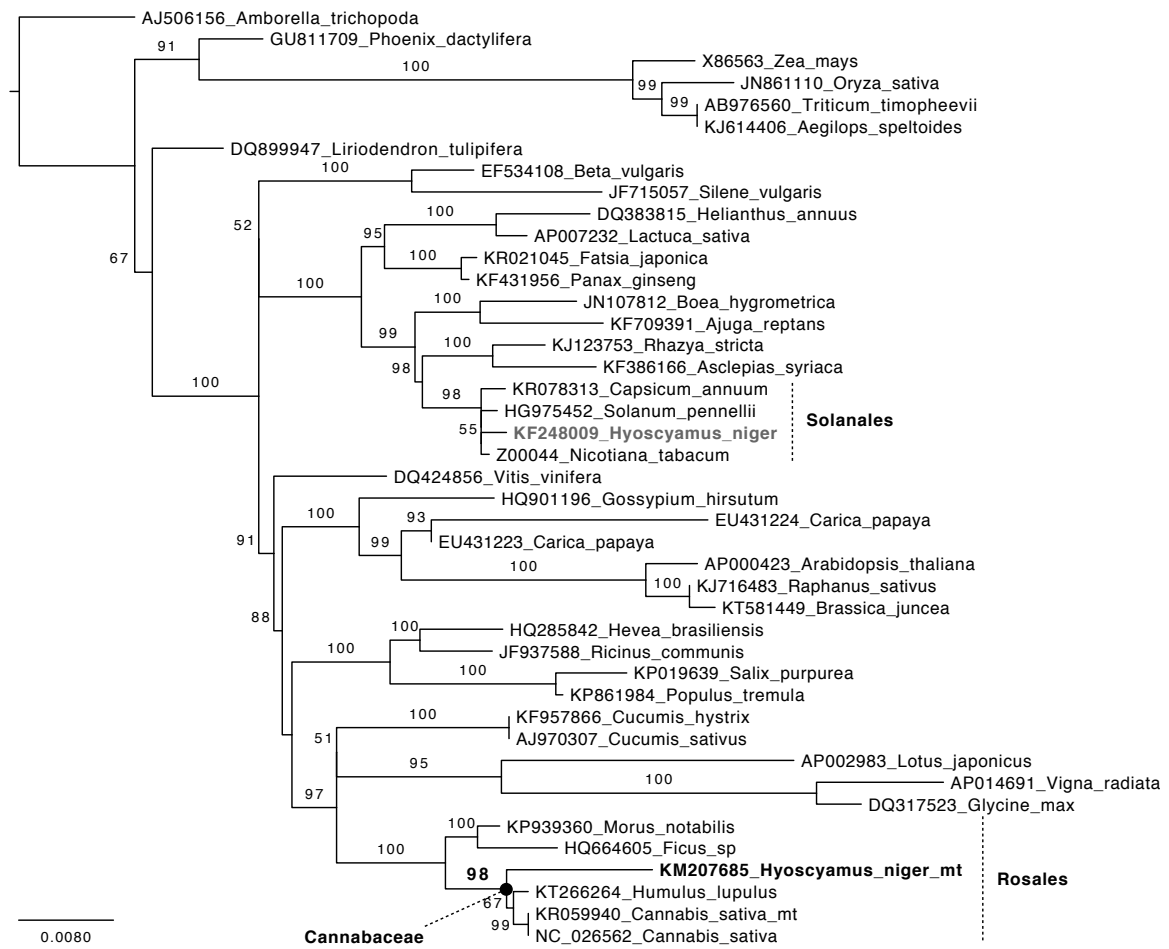

j. *Hyoscyamus niger*, plastid non-coding region (194 nt)

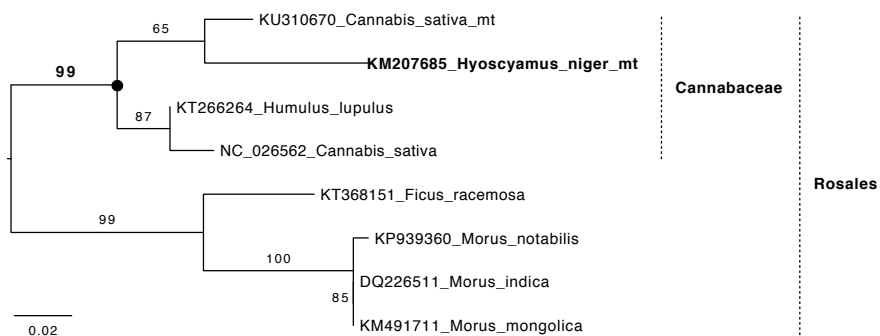



k. *Hyoscyamus niger*, *petB* (1,263 nt)

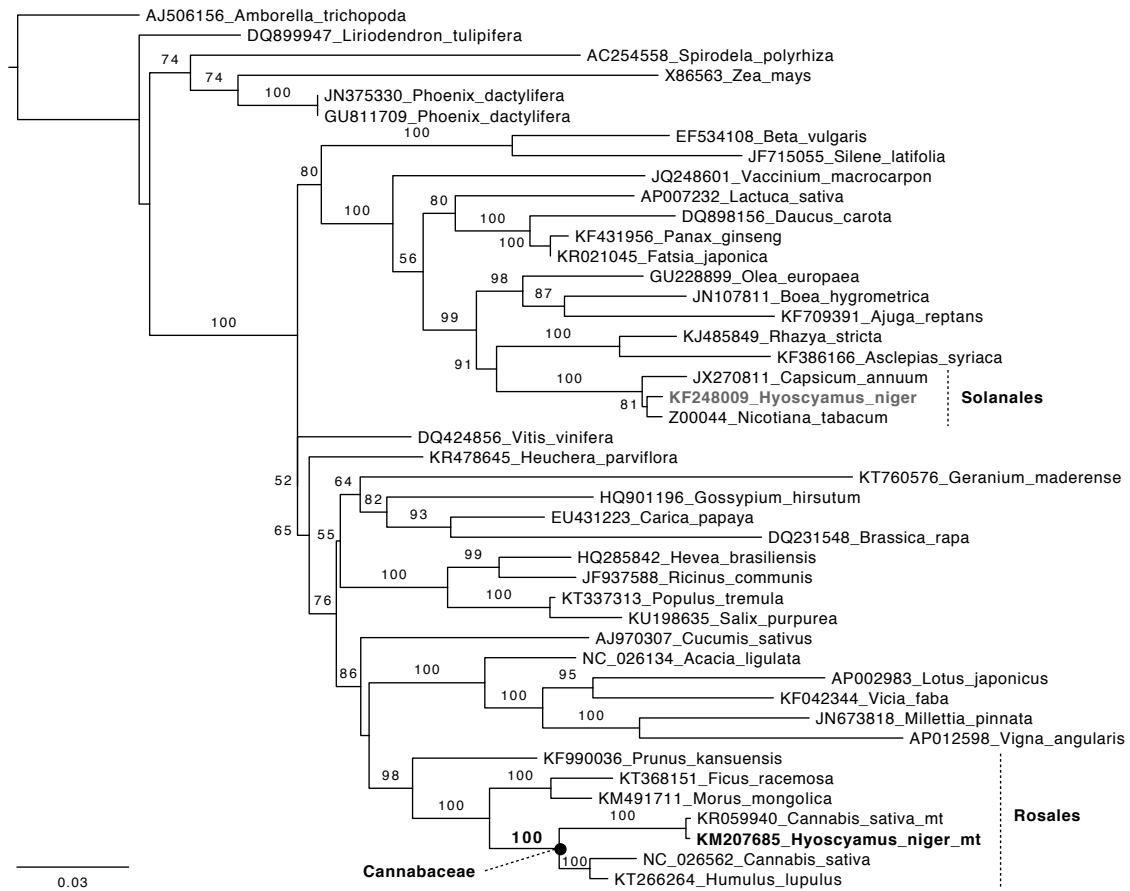

I. *Lophophytum mirabile*, *rpl2* (fragment\_1 245 nt; fragment\_2 771 nt)

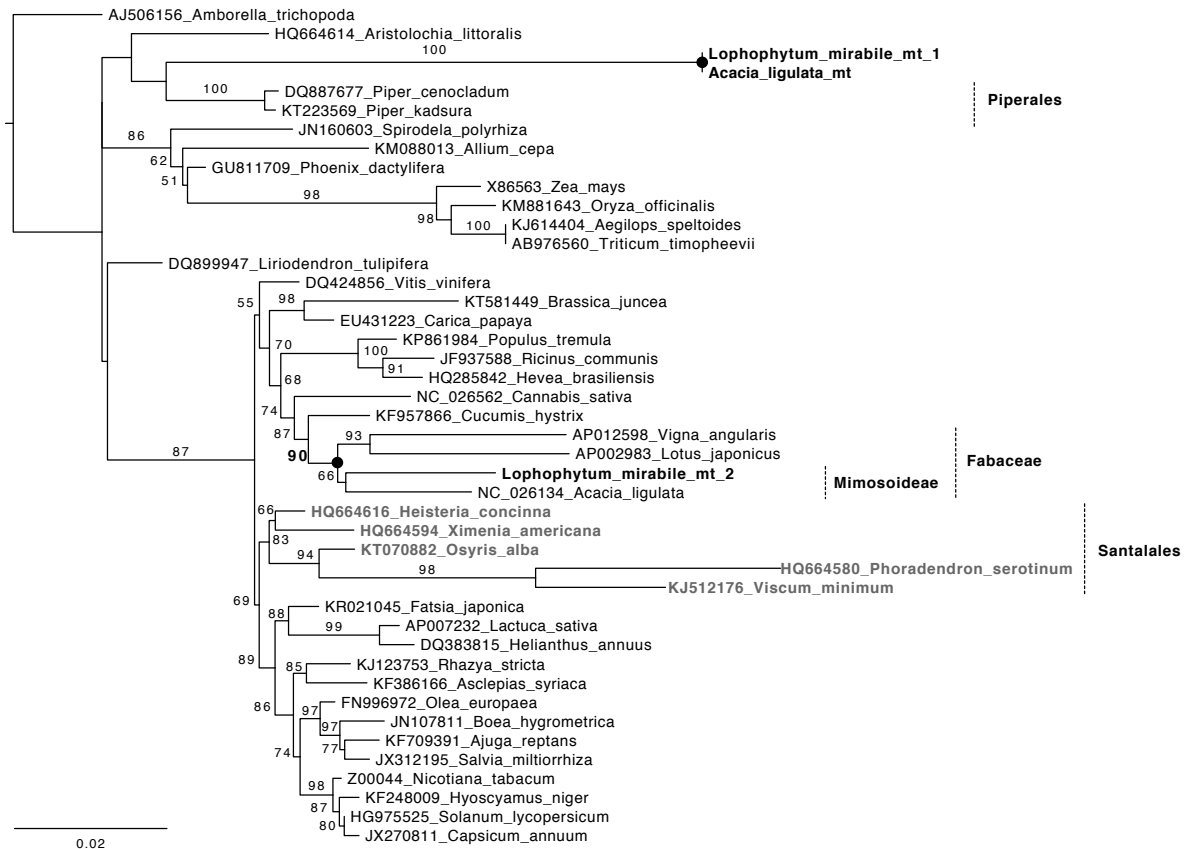

m. *Lophophytum mirabile*, *rrn23* (726 nt)

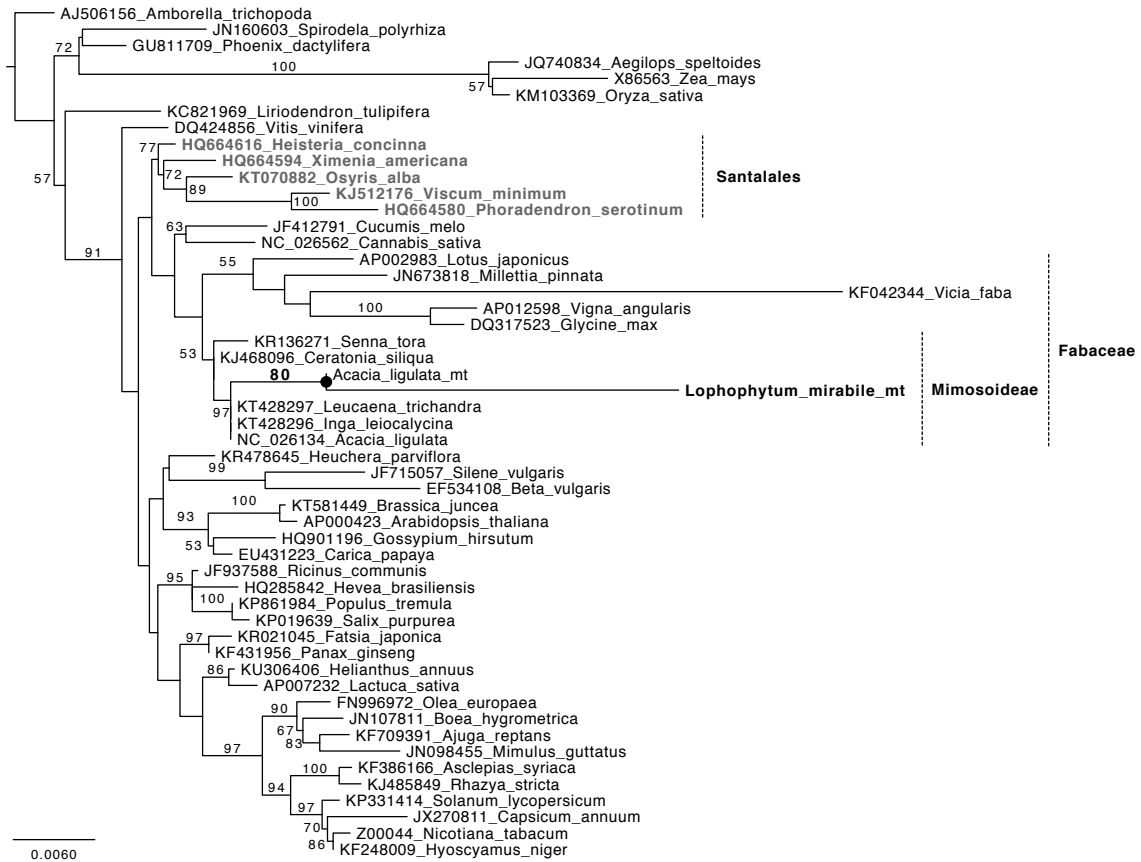

n. *Lophophytum mirabile*, psbA (638 nt)

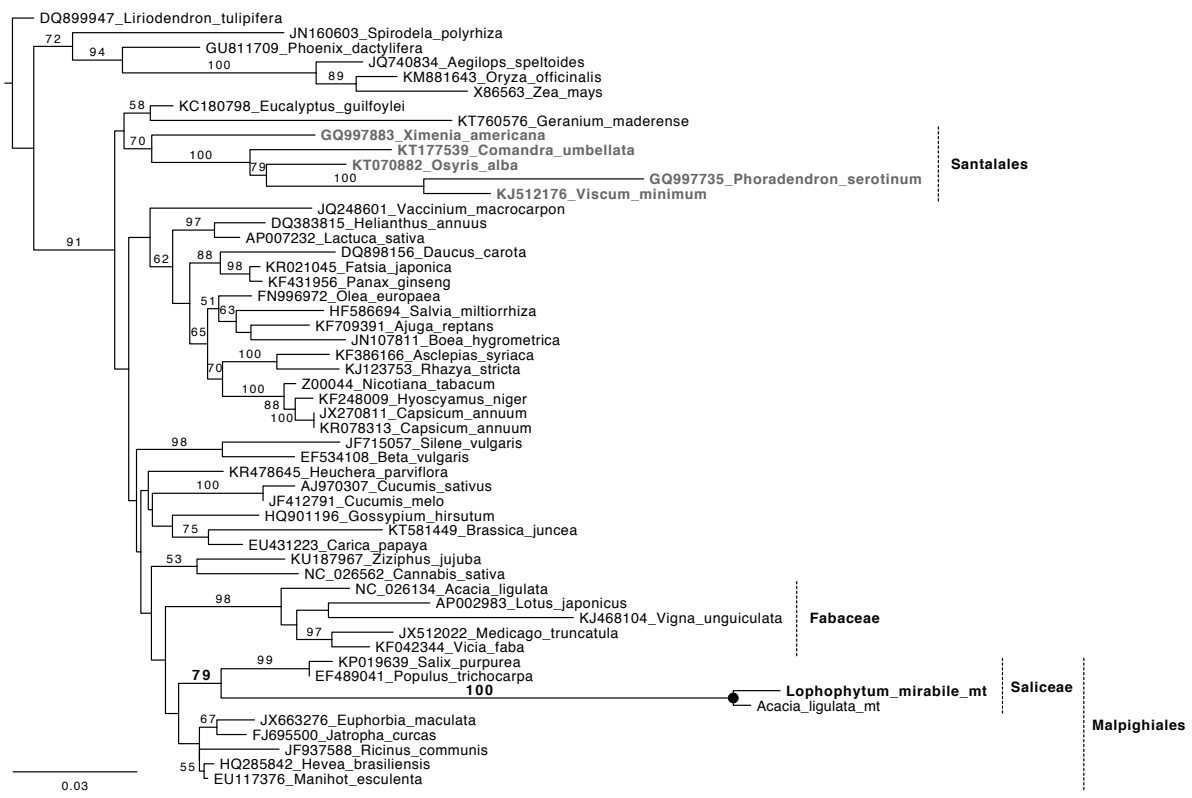

*Lophophytum mirabile*, *rpl16* (520 nt)

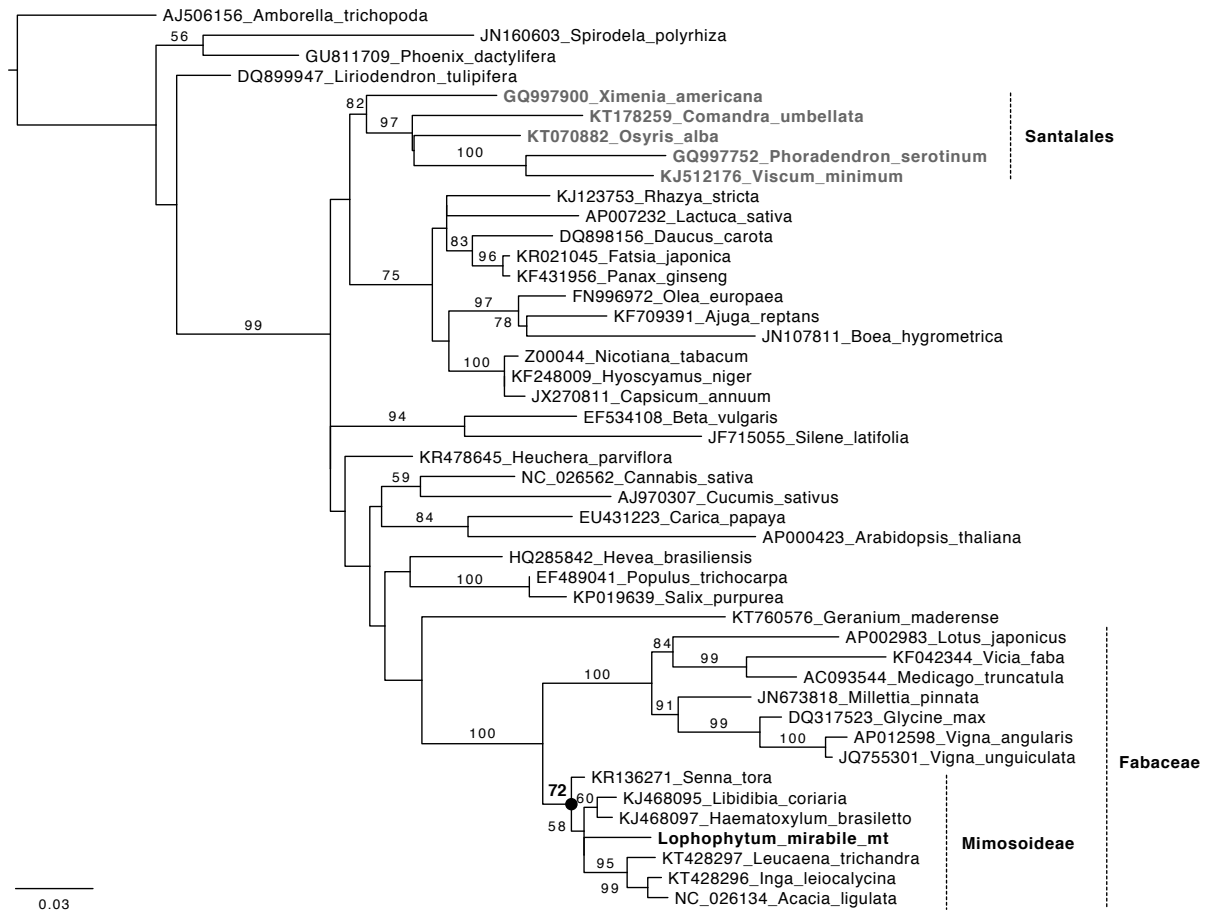

p. *Lophophytum mirabile*, *petG-trnW* (673 nt)

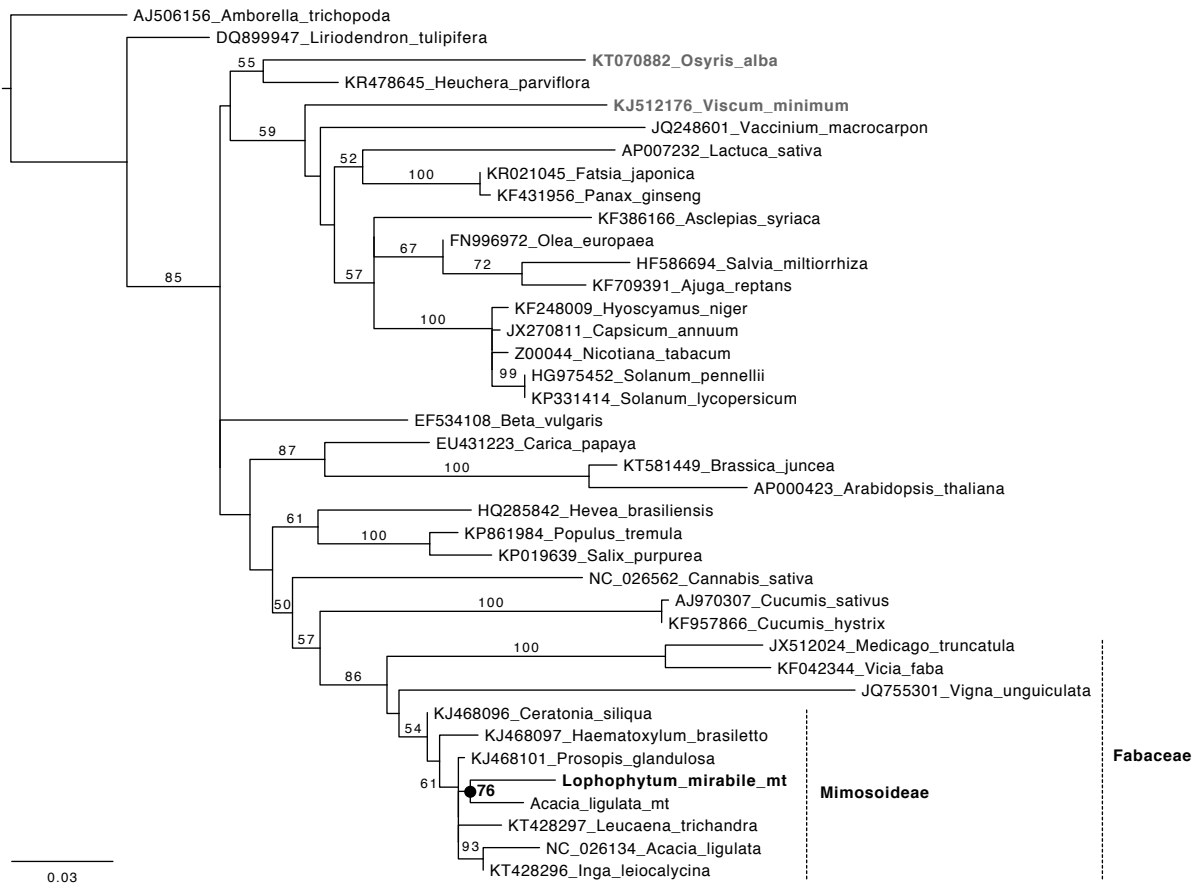

q. *Lophophytum mirabile*, *rbcL* (269 nt)

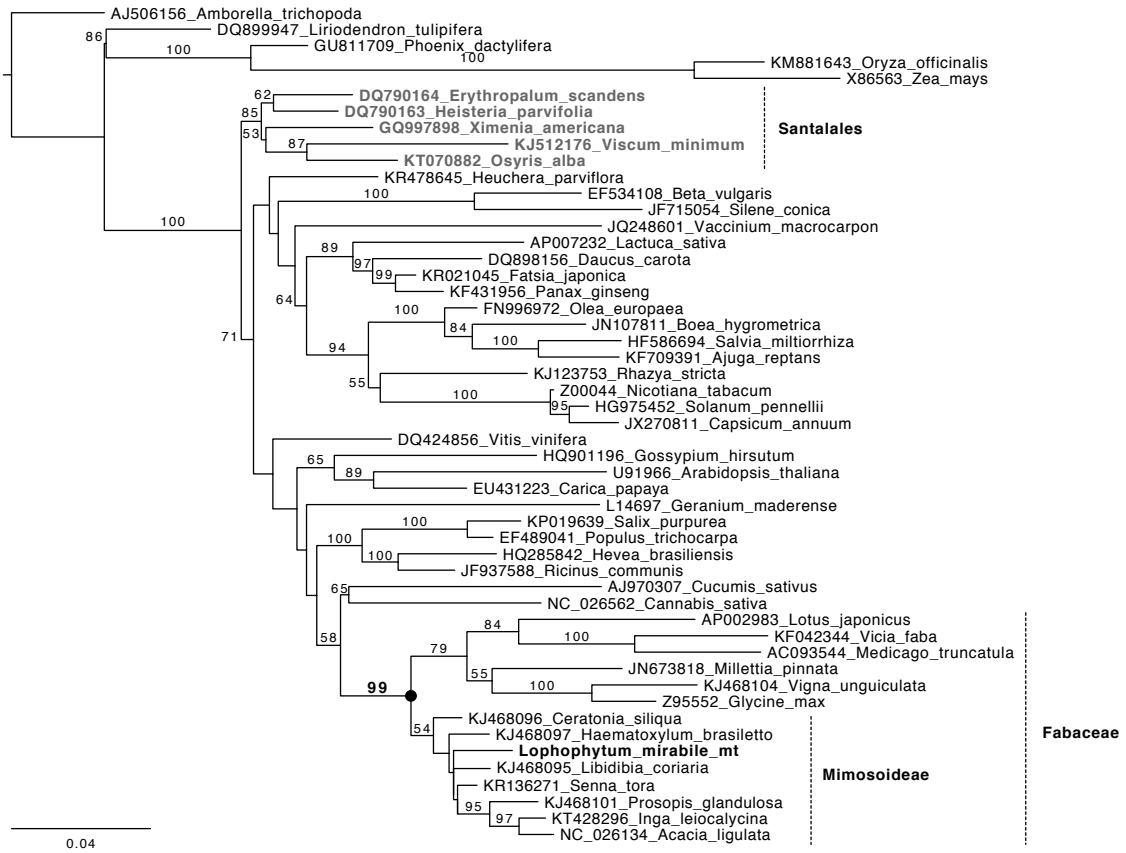

r. *Rhazya stricta*, *trnl - ycf2* (1,623 nt)

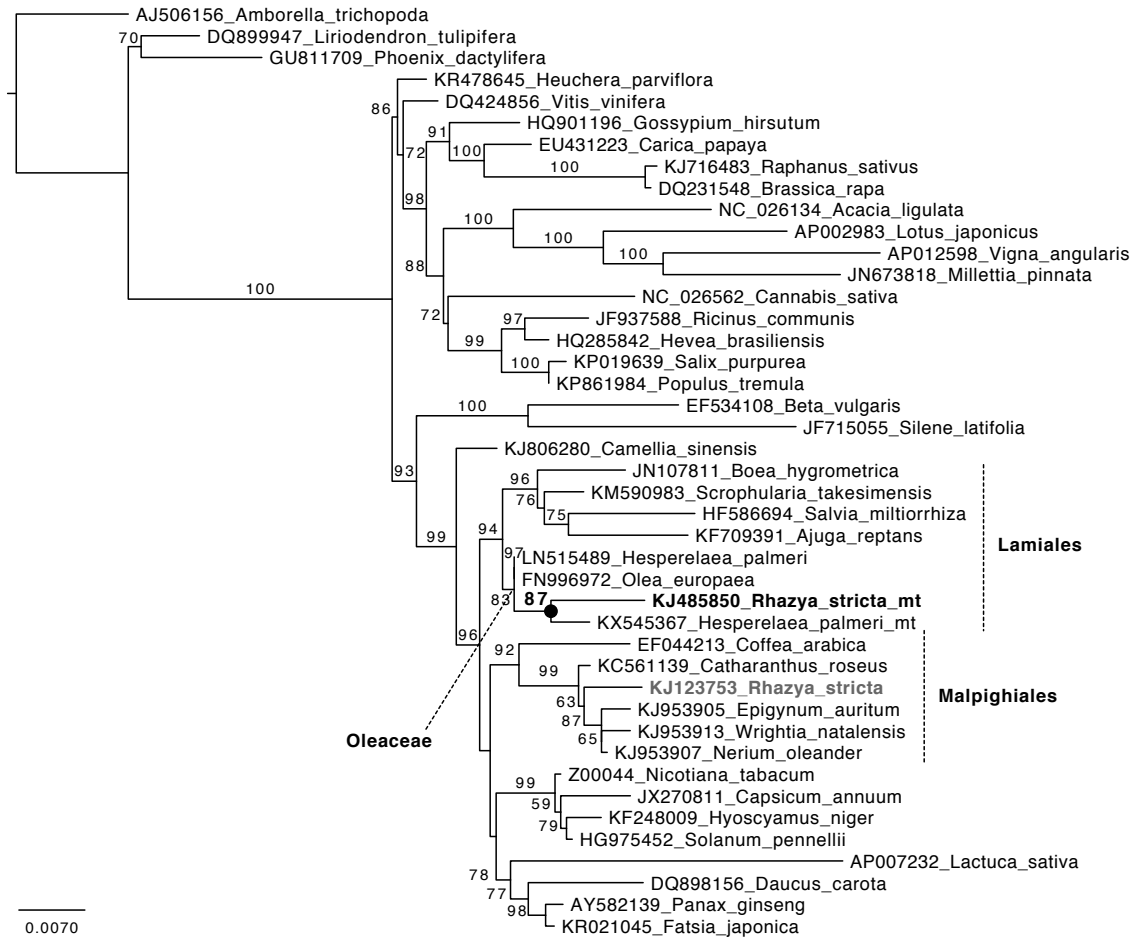



s. *Salvia miltiorrhiza*, *psbA* (350 nt)

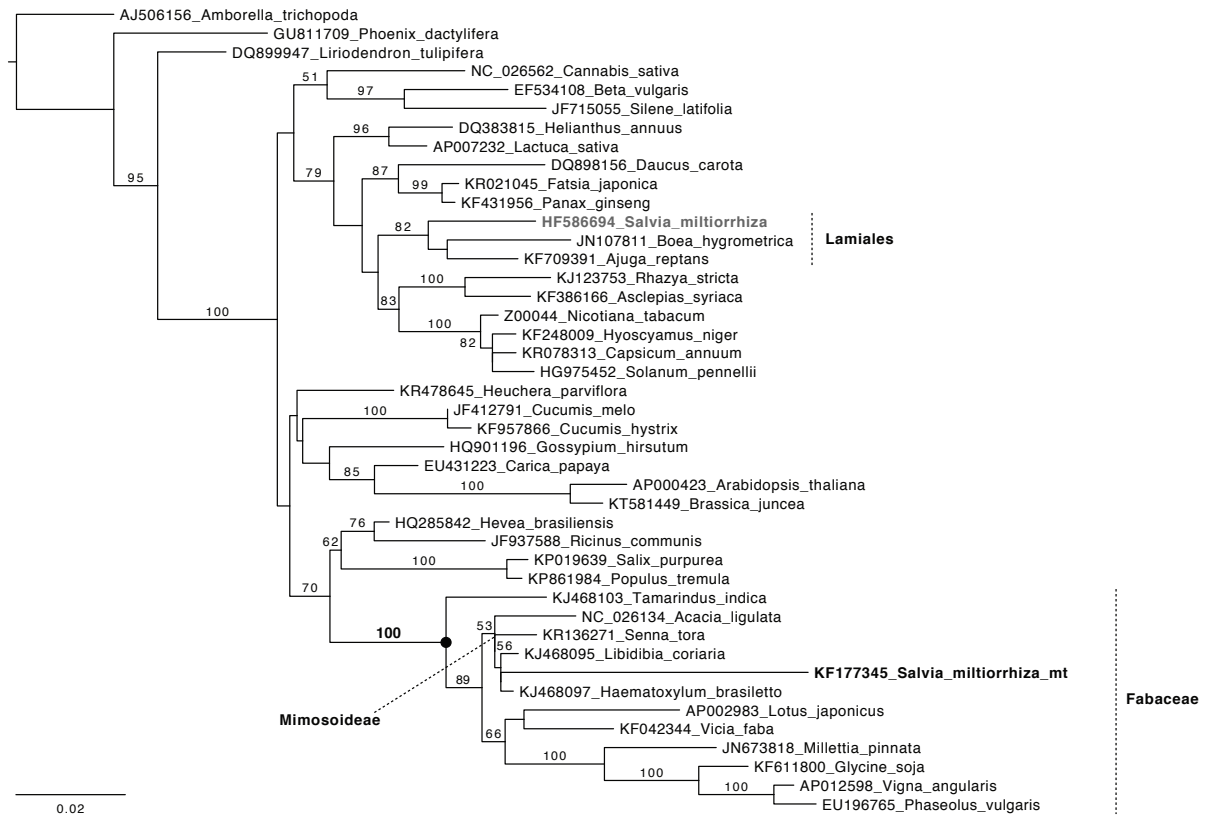

**Figure S3. Best trees of regions flanking foreign plastid-derived sequences in mitochondrial genomes of angiosperms.** Trees were constructed using RAxML v.8.0.0 under the GTRGAMMA model. Each tree was rooted with *Amborella trichopoda*, if available. Bootstrap support values (1,000 replicates) >50% are shown above the branches. MTPTs and plastid-encoded sequences of the recipient, or the closest species to the recipient, are shown in black and grey bold face, respectively.

a. *Amborella trichopoda*, *rbcL*, 5' flanking region, non-coding region (314 nt)

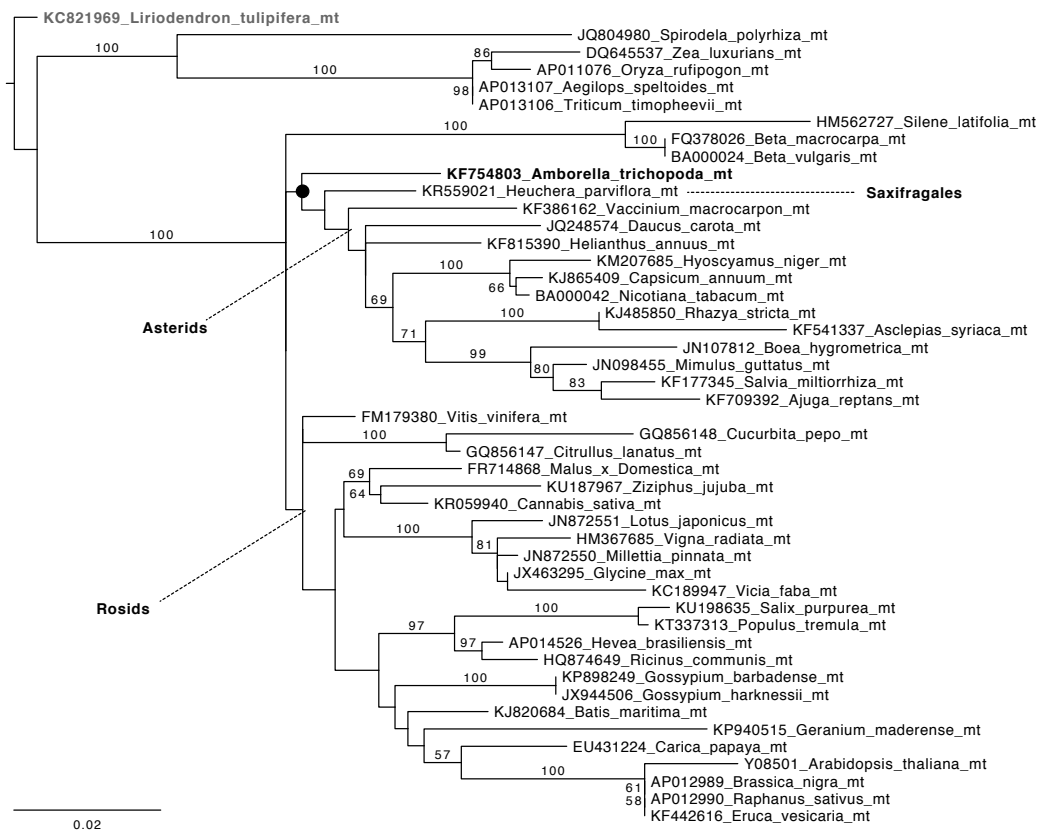

b. *Amborella trichopoda*, *psaA*, 3' flanking region, non-coding region (883 nt)

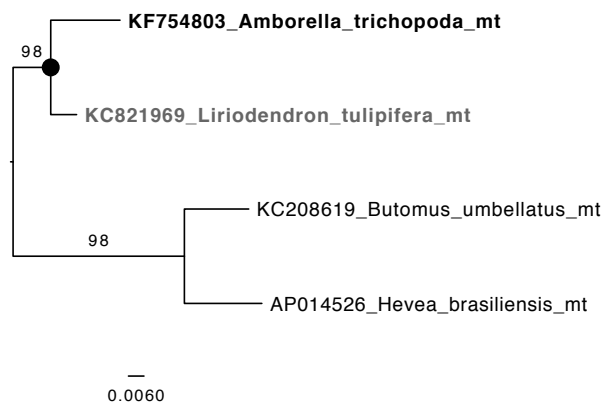

c. *Amborella trichopoda*, *rps7-rps12-trnV-rrnS*, 5' flanking region, non-coding region (2,185 nt)

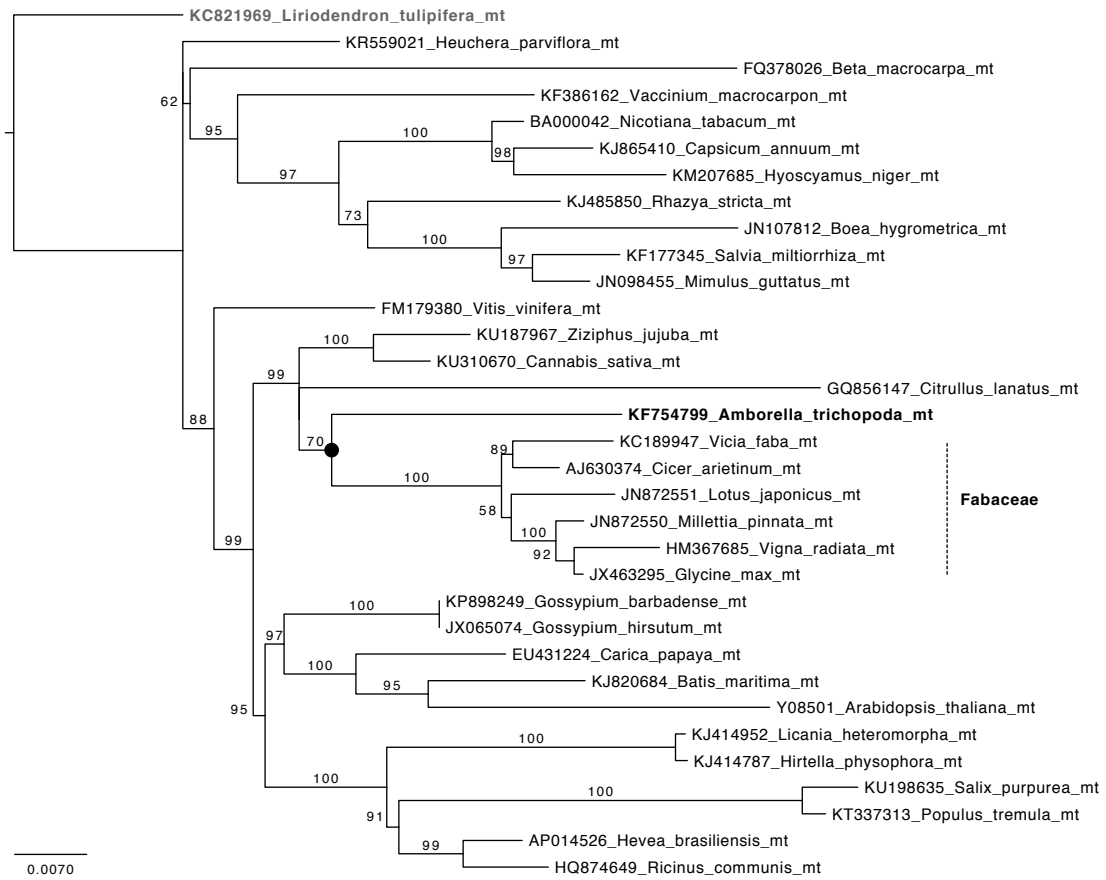

d. *Asclepias syriaca* (fragment 3, non-coding region), 3' flanking region, non-coding region (196 nt)

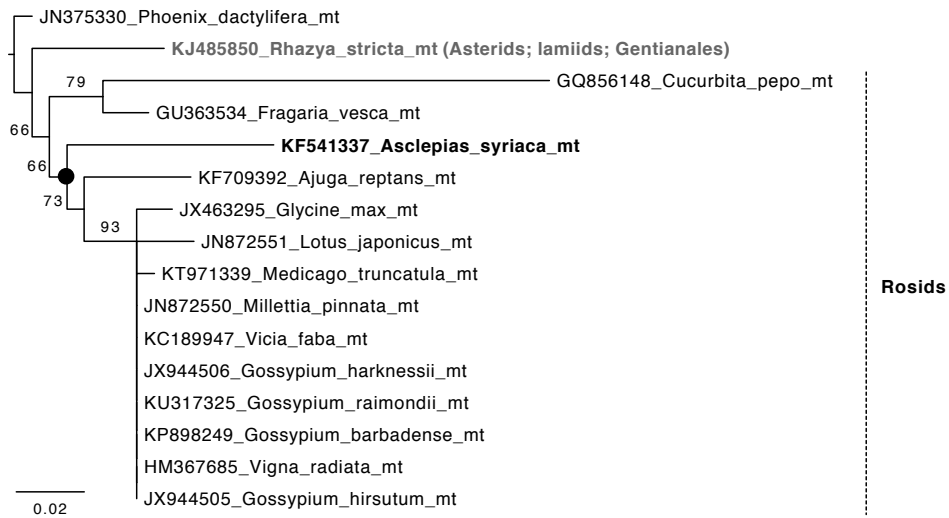

e. *Geranium brycei*, *psaA*, 3' flanking region, non-coding region (147 nt)

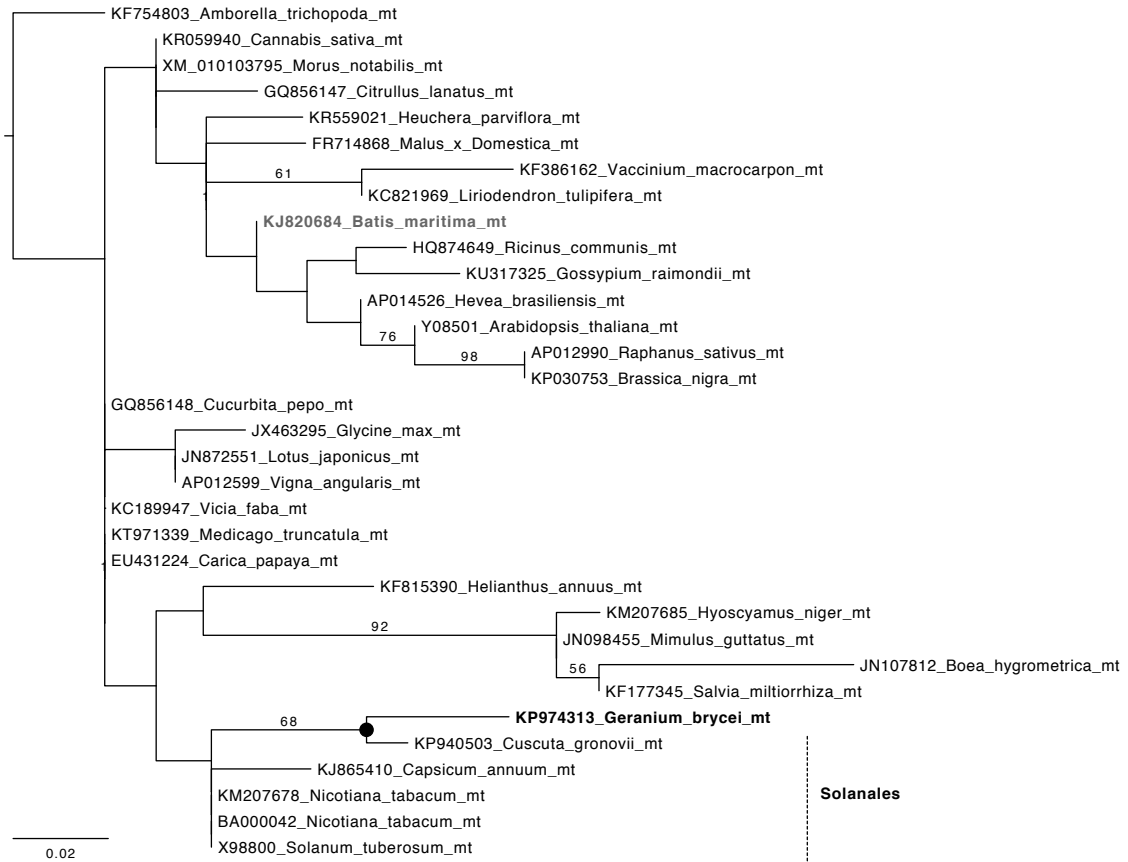

f. *Geranium brycei*, *psaB-rps14*, 3' flanking region, *trnE* and *trnQ* (825 nt)

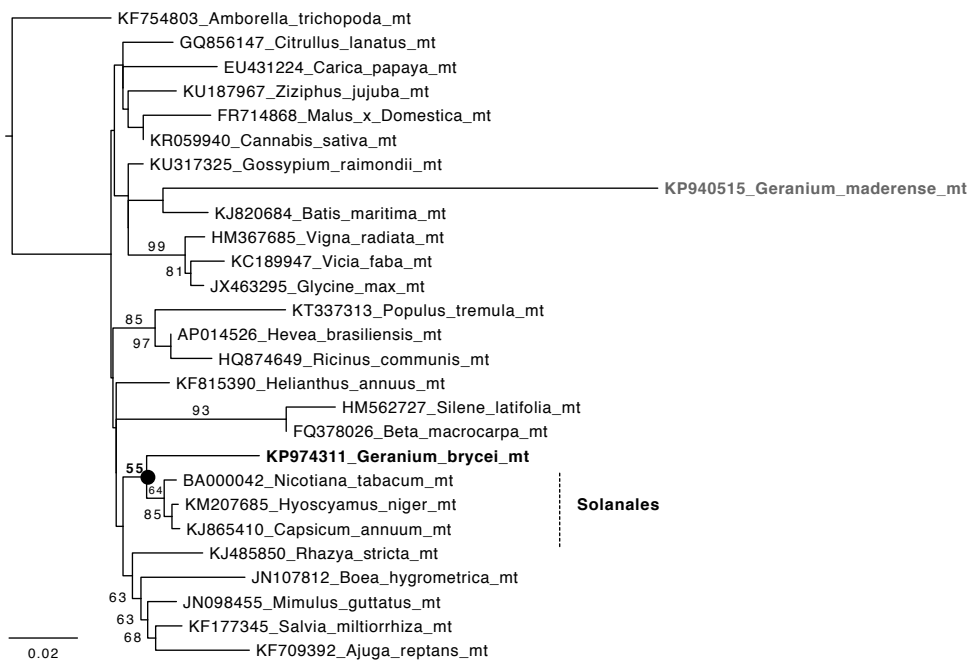

g. *Helianthus annuus*, *infA-rps8*; *rps11*, 3' flanking region, non-coding region (240 nt)

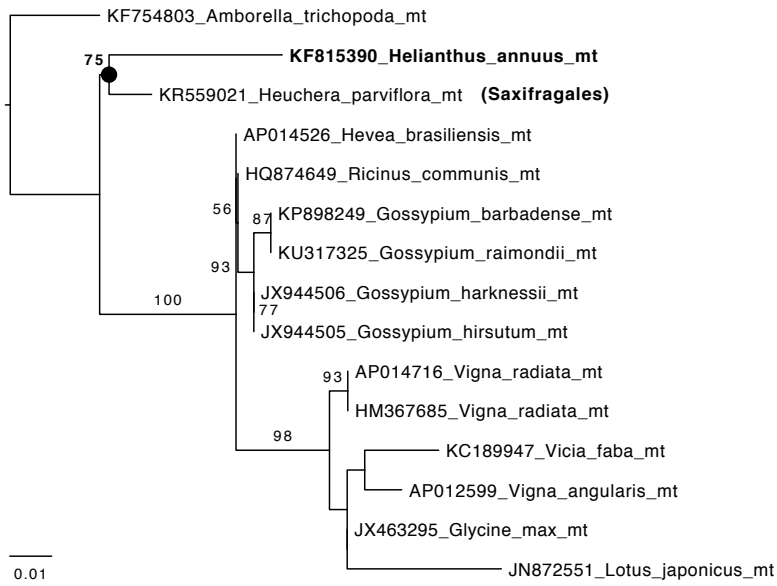

h. *Helianthus annuus*, *infA-rps8*; *rps11*, 5' flanking region, *cox1* (1,695 nt)

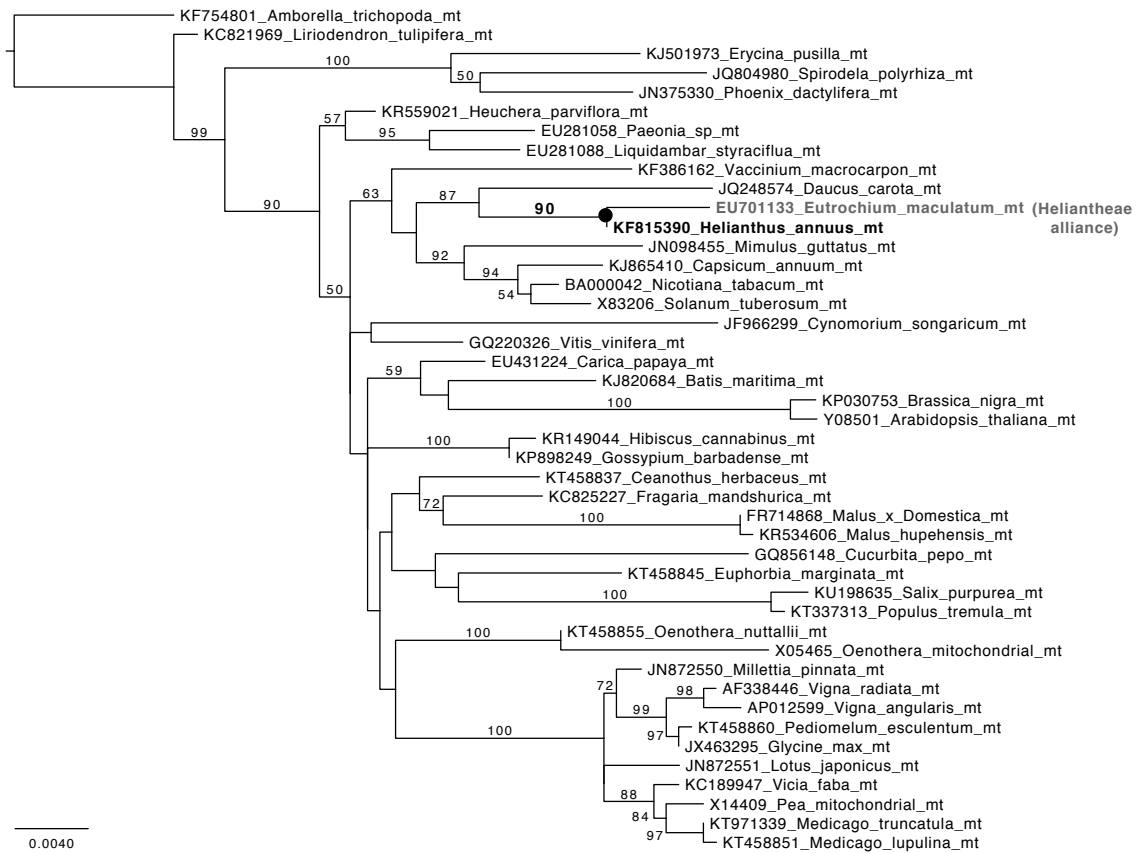

i. *Lophophytum mirabile* (1), *rpl2*, 5' flanking region, non-coding region (996 nt)

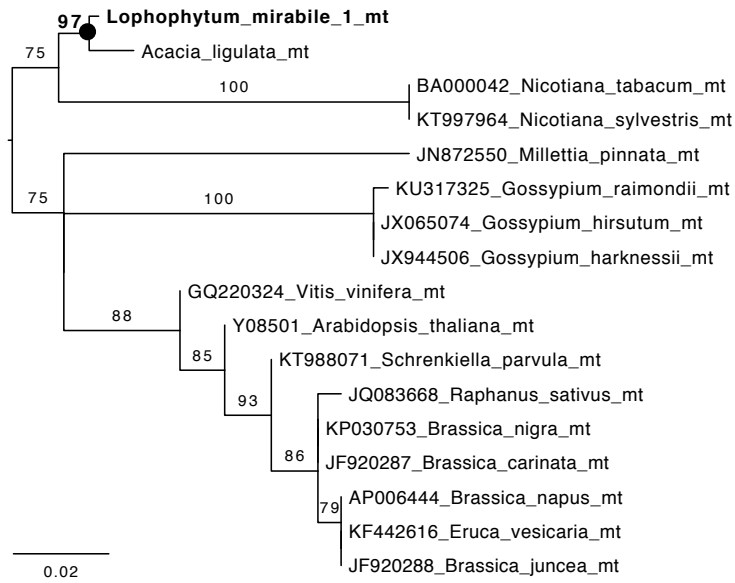

j. *Lophophytum mirabile*, *rrn23*, 3' flanking region, non-coding region (811 nt)

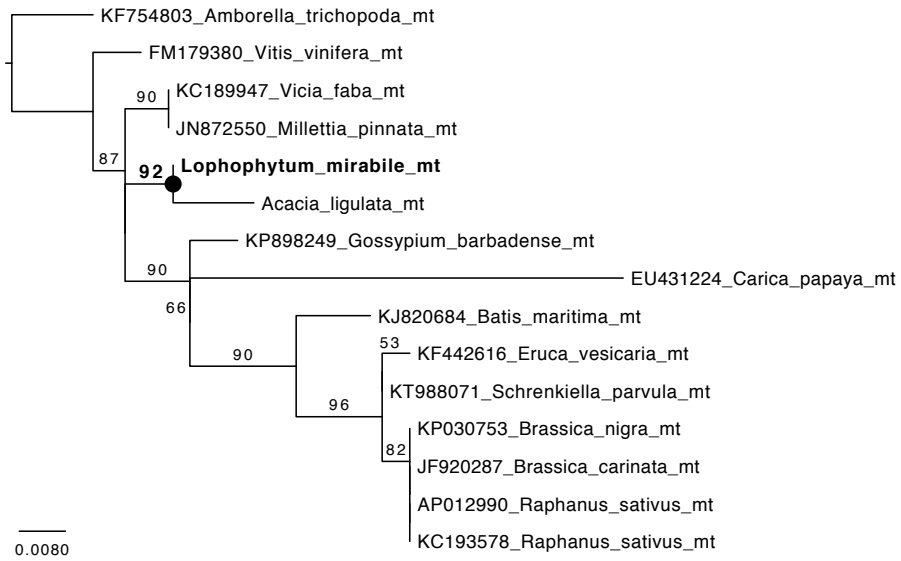

k. *Lophophytum mirabile*, *psbA*, 3' flanking region, *nad1* fragment (pseudogene)  
(1,079 nt)

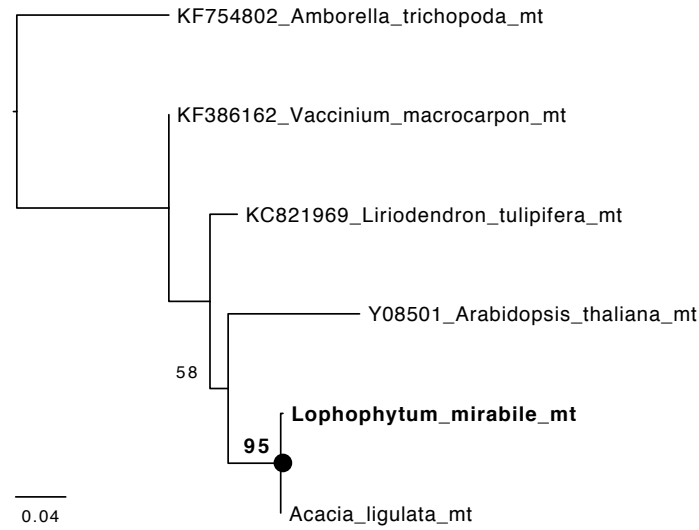

l. *Lophophytum mirabile*, *petG-trnW*, 5' flanking region, *nad9* fragment (pseudogene)  
(385 nt)

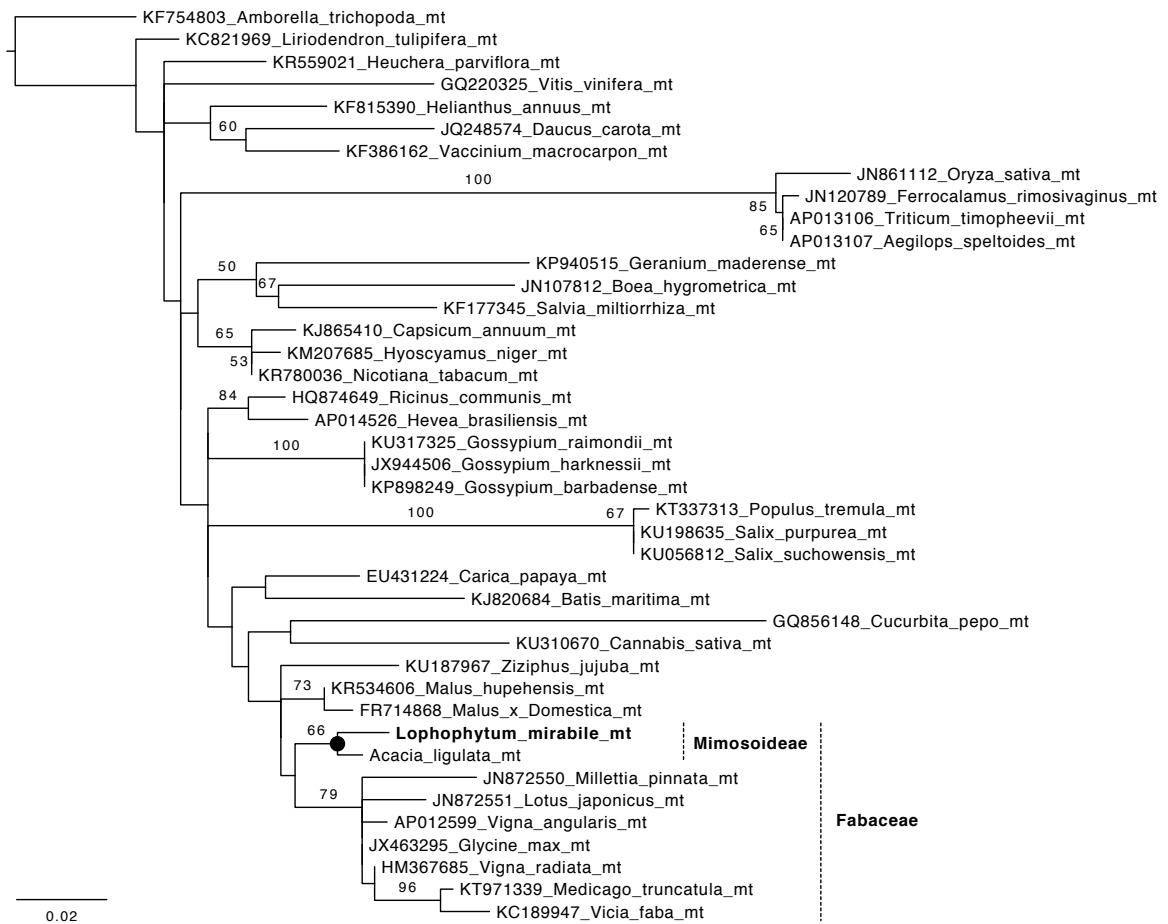

m. *Lophophytum mirabile*, *rbcl*, 3' flanking region, non-coding region (1,164 nt)

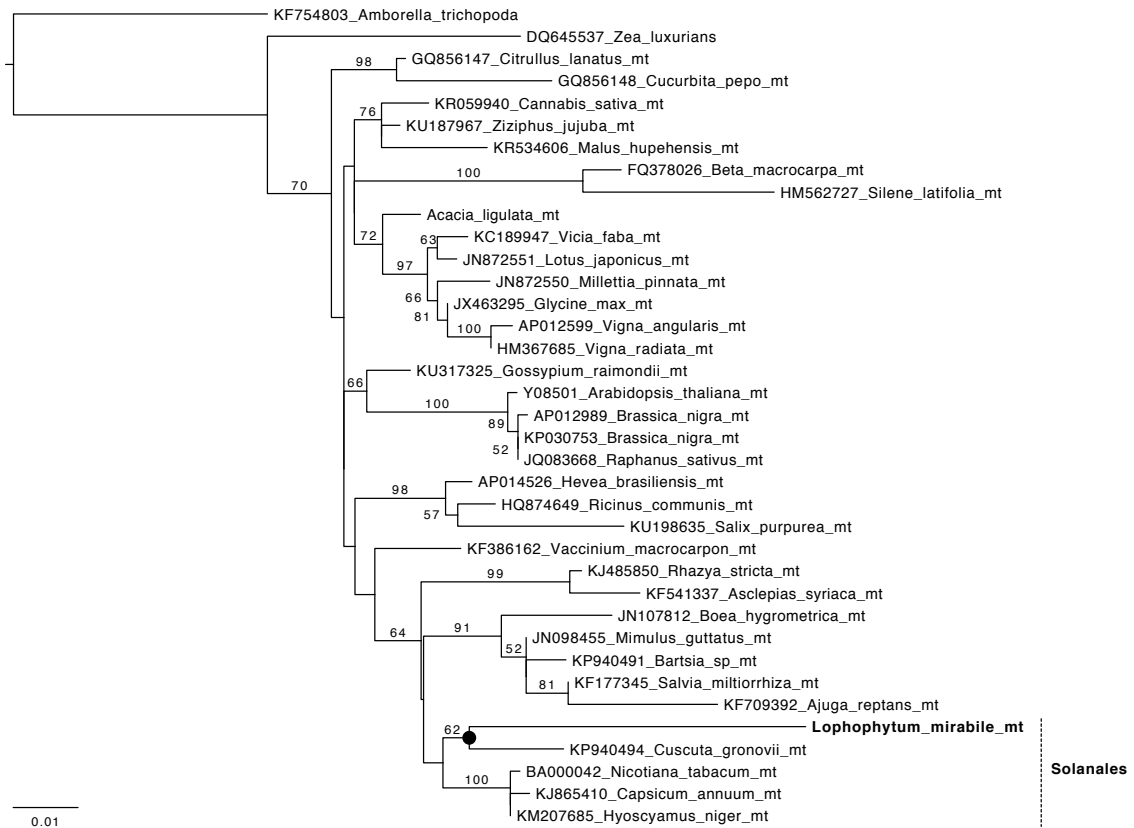

n. *Salvia miltiorrhiza*, *psbA*, 3' flanking region, non-coding region (215 nt)

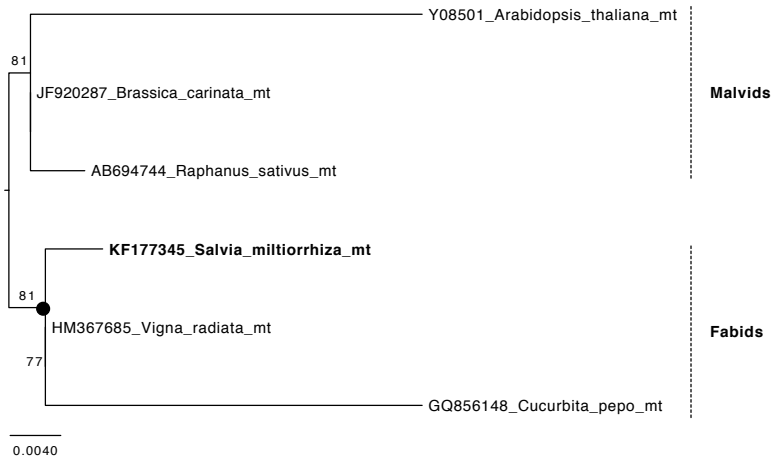



o. *Sapria himalayana*, *psbC-psbD*, 3' flanking region, *rpl2* fragment (pseudogene) (1,157 nt)

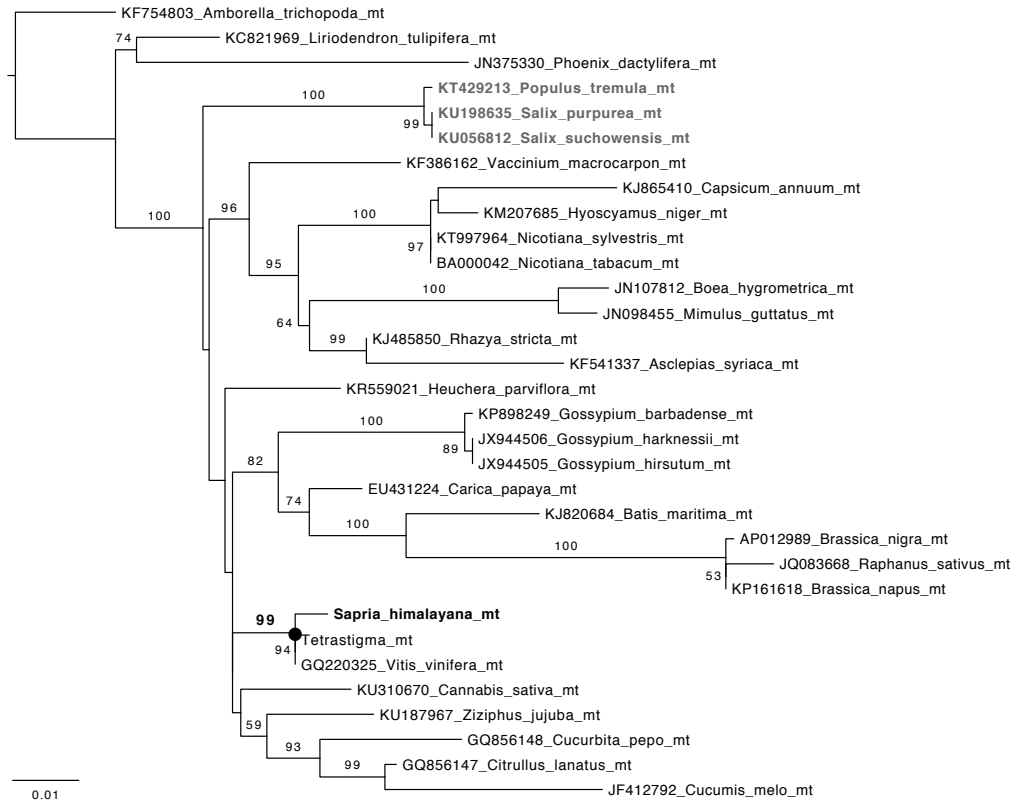

p. *Sapria himalayana*, *atpB*, 3' flanking region, partial *trnQ* (219 nt)

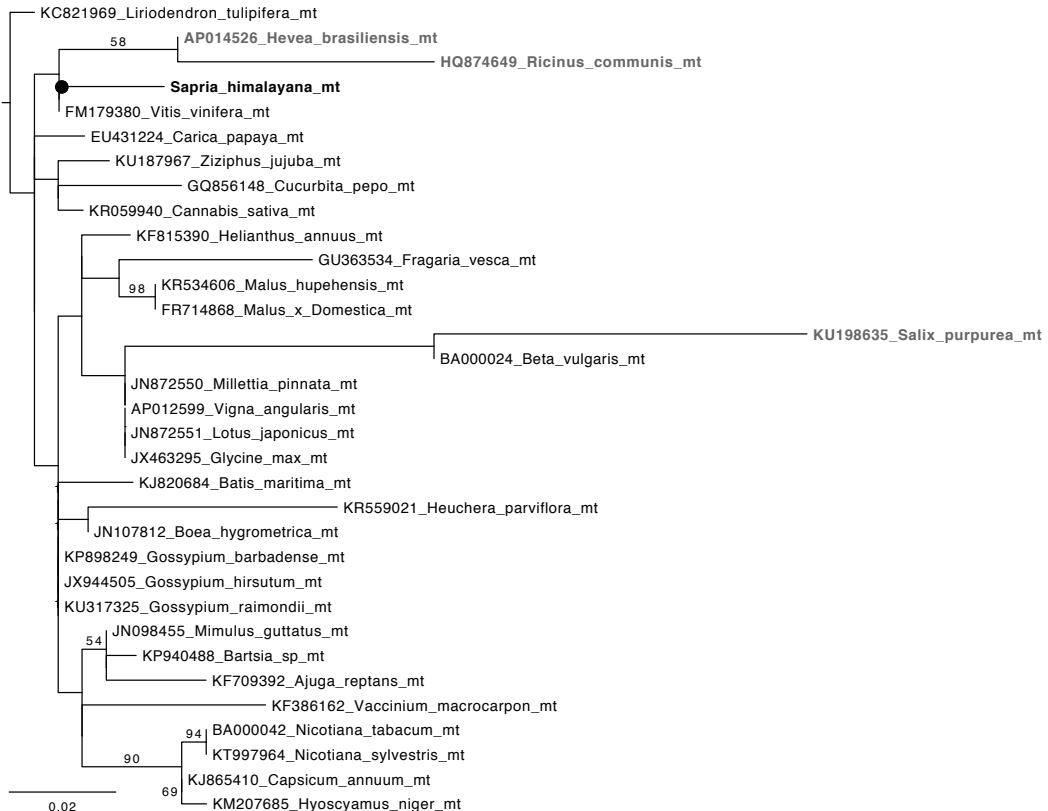

q. *Sapria himalayana*, *rps12*, 3' flanking region, non-coding region (1,048 nt)

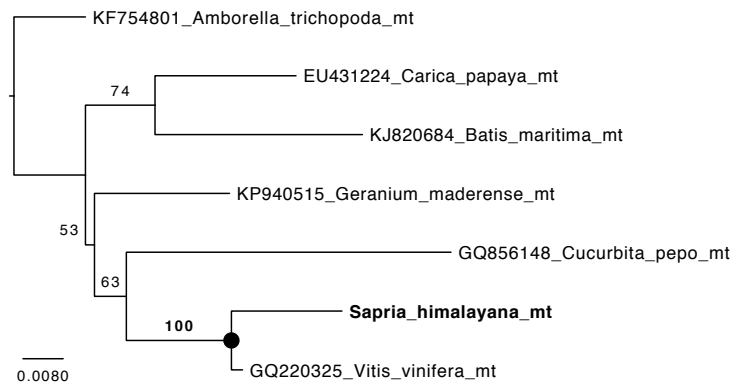

Supplement: srep43402-s1.pdf [file srep43402-s1.pdf]
